# Supplementary material for: Association of Plasma Lipopolysaccharide-Binding Protein Concentration with Dietary Factors, Gut Microbiota, and Health Status in the Japanese General Adult Population: A Cross-Sectional Study
Source: MDPI journal article supplement (doi:10.3390/metabo13020250), 2023-02-09
Supplement: s1 [file s1]

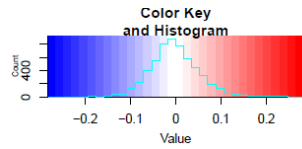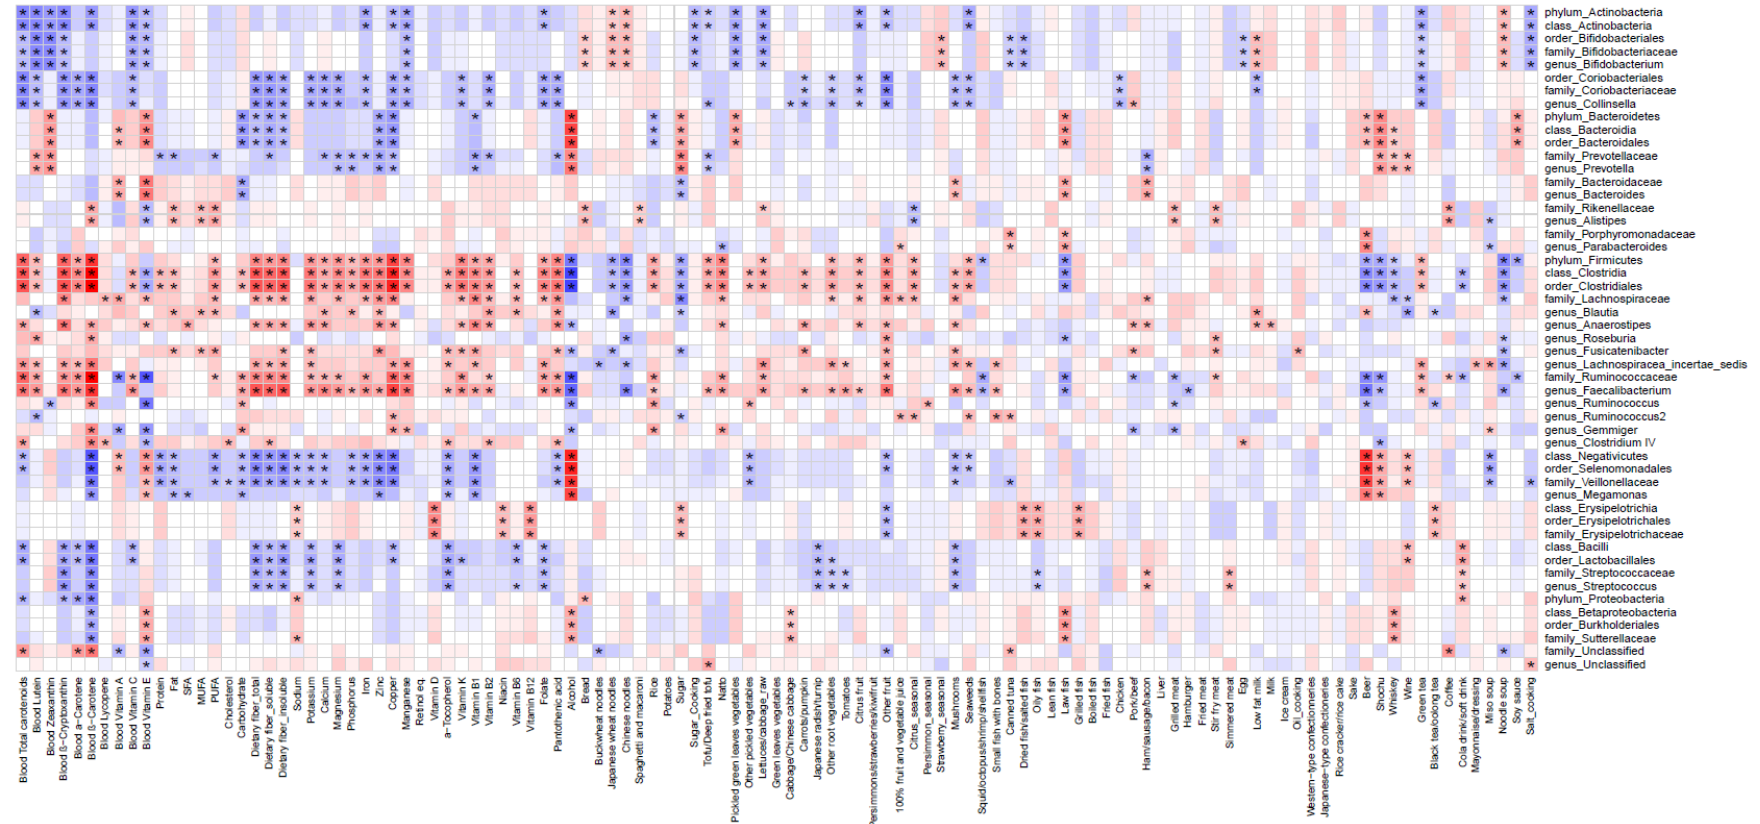

**Figure S1.** Heatmap showing the relationship between dietary factors and gut microbiota. The positive correlation is shown in red, and the negative correlation is shown in blue. The color intensity shows the magnitude of  $\beta$  values. False discovery rates were evaluated by Storey method. \*  $Q < 0.20$ .

**Table S1.** Measurement methods of clinical markers and clinical scores.

| Category           | Variable                            | Method                                                                                                                                                                                                                                                                                                                                                                                                                                                                                                                      |
|--------------------|-------------------------------------|-----------------------------------------------------------------------------------------------------------------------------------------------------------------------------------------------------------------------------------------------------------------------------------------------------------------------------------------------------------------------------------------------------------------------------------------------------------------------------------------------------------------------------|
| Obesity            | Abdominal circumference (cm)        | Measured using a measuring tape                                                                                                                                                                                                                                                                                                                                                                                                                                                                                             |
|                    | Body fat percentage (%)             | Body composition analyzer (Tanita MC190, TANITA Corp., Tokyo, Japan)                                                                                                                                                                                                                                                                                                                                                                                                                                                        |
|                    | Body water content (kg)             | Body composition analyzer (Tanita MC190, TANITA Corp.)                                                                                                                                                                                                                                                                                                                                                                                                                                                                      |
|                    | Visceral fat level (levels)         | Body composition analyzer (Tanita MC190, TANITA Corp.); Visceral fat levels were determined by firmware embedded in the body composition analyser using a proprietary equation developed by the manufacturer. Levels 9 and below are standard, levels 10-14 are slightly excessive and levels 15 and above indicate excessive visceral fat accumulation. Level 10 corresponds to 100 cm <sup>2</sup> of visceral fat measured on a computerized tomography scan.                                                            |
|                    | Basal metabolic rate (kcal/day)     | Body composition analyzer (Tanita MC190, TANITA Corp.)                                                                                                                                                                                                                                                                                                                                                                                                                                                                      |
|                    | Basal metabolic rate level (levels) | Body composition analyzer (Tanita MC190, TANITA Corp.); Basal metabolic rate levels were determined by the firmware built into the body composition analyser using a unique formula developed by the manufacturer. Specifically, basal metabolic rate levels were calculated on a scale of 1-16 based on the average and statistical distribution of basal metabolic reference values by age group. Levels 6 and below indicated low fat burning, levels 7-10 were standard and levels 11 and above indicated easy burning. |
| Blood pressure     | Systolic blood pressure (mmHg)      | Sphygmomanometer (HEM-1040, OMRON Corp., Kyoto, Japan; or ES-P2000BR, Terumo Corp., Tokyo, Japan)                                                                                                                                                                                                                                                                                                                                                                                                                           |
|                    | Diastolic blood pressure (mmHg)     | Sphygmomanometer (HEM-1040, OMRON Corp.; or ES-P2000BR, Terumo Corp.)                                                                                                                                                                                                                                                                                                                                                                                                                                                       |
| Arteriosclerosis   | baPWV (cm/s)                        | Network arterial stiffness detection device (BP-203RPEIII, OMRON Corp.)                                                                                                                                                                                                                                                                                                                                                                                                                                                     |
| Glucose metabolism | HOMA-IR                             | Calculated from blood glucose and insulin levels as previously described [130].                                                                                                                                                                                                                                                                                                                                                                                                                                             |
|                    | Blood glucose (mg/dL)               | Glucokinase-glucose-6-phosphate dehydrogenase method (measurements were performed by LSI Medience Corp. [Tokyo, Japan], a clinical laboratory company)                                                                                                                                                                                                                                                                                                                                                                      |
|                    | HbA1c (%)                           | Enzymatic method (measurements were performed by LSI Medience Corp.)                                                                                                                                                                                                                                                                                                                                                                                                                                                        |

|                   |                                      |                                                                                                                                                                                                                                                                                                                                                                                                                             |
|-------------------|--------------------------------------|-----------------------------------------------------------------------------------------------------------------------------------------------------------------------------------------------------------------------------------------------------------------------------------------------------------------------------------------------------------------------------------------------------------------------------|
| Lipid metabolism  | Blood insulin ( $\mu\text{U/mL}$ )   | Chemiluminescent immunoassay (measurements were performed by LSI Medience Corp.)                                                                                                                                                                                                                                                                                                                                            |
|                   | C peptide ( $\text{ng/mL}$ )         | Chemiluminescent immunoassay (measurements were performed by LSI Medience Corp.)                                                                                                                                                                                                                                                                                                                                            |
|                   | Glycoalbumin (%)                     | Enzymatic method (measurements were performed by LSI Medience Corp.)                                                                                                                                                                                                                                                                                                                                                        |
|                   | Triglyceride ( $\text{mg/dL}$ )      | Enzymatic method (measurements were performed by LSI Medience Corp.)                                                                                                                                                                                                                                                                                                                                                        |
|                   | Total cholesterol ( $\text{mg/dL}$ ) | Enzymatic method (measurements were performed by LSI Medience Corp.)                                                                                                                                                                                                                                                                                                                                                        |
| Physical function | HDL-cholesterol ( $\text{mg/dL}$ )   | Enzymatic method (measurements were performed by LSI Medience Corp.)                                                                                                                                                                                                                                                                                                                                                        |
|                   | LDL-cholesterol ( $\text{mg/dL}$ )   | Enzymatic method (measurements were performed by LSI Medience Corp.)                                                                                                                                                                                                                                                                                                                                                        |
|                   | Estimated bone mass (kg)             | Body composition analyzer (Tanita MC190, TANITA Corp., Tokyo, Japan)                                                                                                                                                                                                                                                                                                                                                        |
|                   | Muscle mass (kg)                     | Body composition analyzer (Tanita MC190, TANITA Corp.)                                                                                                                                                                                                                                                                                                                                                                      |
|                   | Right leg (kg)                       | Body composition analyzer (Tanita MC190, TANITA Corp.)                                                                                                                                                                                                                                                                                                                                                                      |
|                   | Left leg (kg)                        | Body composition analyzer (Tanita MC190, TANITA Corp.)                                                                                                                                                                                                                                                                                                                                                                      |
|                   | Right arm (kg)                       | Body composition analyzer (Tanita MC190, TANITA Corp.)                                                                                                                                                                                                                                                                                                                                                                      |
|                   | Left arm (kg)                        | Body composition analyzer (Tanita MC190, TANITA Corp.)                                                                                                                                                                                                                                                                                                                                                                      |
|                   | Trunk (kg)                           | Body composition analyzer (Tanita MC190, TANITA Corp.)                                                                                                                                                                                                                                                                                                                                                                      |
|                   | Locomo 25 score (points)             | Locomo 25 score was evaluated with Locomo 25 questionnaire, a screening tool for locomotive syndrome established by a Japanese orthopedic surgeon group [131]. It consists of 25 questions aimed at musculoskeletal disorders such as walking disability, difficulty in daily living, or suffering pain within the body. Scores can range from 0 to 100, and higher scores indicate a greater decline of mobility function. |
| Eyesight          | Far-sightedness                      | Automatic visual analyzer (CA-1000, TOMEY CORP., Nagoya, Japan); Far-sightedness was determined with Landolt ring as previously described [132].                                                                                                                                                                                                                                                                            |
|                   | Near-sightedness                     | Automatic visual analyzer (CA-1000, TOMEY CORP.); Near-sightedness was determined with Landolt ring as previously described [132].                                                                                                                                                                                                                                                                                          |
| Liver function    | Albumin ( $\text{g/dL}$ )            | Bromocresol purple method (measurements were performed by LSI Medience Corp.)                                                                                                                                                                                                                                                                                                                                               |

|                         |                                            |                                                                                                             |
|-------------------------|--------------------------------------------|-------------------------------------------------------------------------------------------------------------|
| Renal function          | AST (U/L)                                  | Japan Society of Clinical Chemistry transferable method (measurements were performed by LSI Medience Corp.) |
|                         | ALT (U/L)                                  | Japan Society of Clinical Chemistry transferable method (measurements were performed by LSI Medience Corp.) |
|                         | $\gamma$ -GTP (U/L)                        | Japan Society of Clinical Chemistry transferable method (measurements were performed by LSI Medience Corp.) |
|                         | Total bilirubin (mg/dL)                    | Enzymatic method (measurements were performed by LSI Medience Corp.)                                        |
|                         | Total Protein (g/dL)                       | Burette method (measurements were performed by LSI Medience Corp.)                                          |
|                         | Creatinine (mg/dL)                         | Enzymatic method (measurements were performed by LSI Medience Corp.)                                        |
|                         | Blood urea nitrogen (mg/dL)                | Urease-glutamate dehydrogenase method (measurements were performed by LSI Medience Corp.)                   |
|                         | Plasma renin activity (ng/mL/hr)           | Enzyme immunoassay (measurements were performed by LSI Medience Corp.)                                      |
| Adrenal cortex function | Urine albumin creatinine ratio (mg/gCr)    | Turbidimetric immunoassay (measurements were performed by LSI Medience Corp.)                               |
|                         | Aldosterone (pg/mL)                        | Radioimmunoassay (measurements were performed by LSI Medience Corp.)                                        |
|                         | Cortisol ( $\mu$ g/dL)                     | Chemiluminescent immunoassay (measurements were performed by LSI Medience Corp.)                            |
| Cardiac function        | Brain natriuretic peptide (pg/mL)          | Chemiluminescent immunoassay (measurements were performed by LSI Medience Corp.)                            |
|                         | Troponin I (pg/mL)                         | Chemiluminescent immunoassay (measurements were performed by LSI Medience Corp.)                            |
| Thyroid function        | Free thyroxine (ng/dL)                     | Electro Chemiluminescence Immunoassay (measurements were performed by LSI Medience Corp.)                   |
|                         | Thyroid stimulating hormone ( $\mu$ IU/mL) | Chemiluminescent immunoassay (measurements were performed by LSI Medience Corp.)                            |
| Genital function        | Testosterone (ng/mL)                       | Chemiluminescent immunoassay (measurements were performed by LSI Medience Corp.)                            |
| Inflammation            | Neutrophil (%)                             | Flow cytometry (measurements were performed by LSI Medience Corp.)                                          |

|                                        |                                         |                                                                                                    |
|----------------------------------------|-----------------------------------------|----------------------------------------------------------------------------------------------------|
| Oxidative stress<br>Hematological test | Stab neutrophil (%)                     | Flow cytometry (measurements were performed by LSI Medience Corp.)                                 |
|                                        | Segmented neutrophil (%)                | Flow cytometry (measurements were performed by LSI Medience Corp.)                                 |
|                                        | Lymphocyte (%)                          | Flow cytometry (measurements were performed by LSI Medience Corp.)                                 |
|                                        | Monocyte (%)                            | Flow cytometry (measurements were performed by LSI Medience Corp.)                                 |
|                                        | Eosinophil (%)                          | Flow cytometry (measurements were performed by LSI Medience Corp.)                                 |
|                                        | Basophil (%)                            | Flow cytometry (measurements were performed by LSI Medience Corp.)                                 |
|                                        | IgG (mg/dL)                             | Turbidimetric immunoassay (measurements were performed by LSI Medience Corp.)                      |
|                                        | IgA (mg/dL)                             | Turbidimetric immunoassay (measurements were performed by LSI Medience Corp.)                      |
|                                        | IgM (mg/dL)                             | Turbidimetric immunoassay (measurements were performed by LSI Medience Corp.)                      |
|                                        | Complement C3 (mg/dL)                   | Turbidimetric immunoassay (measurements were performed by LSI Medience Corp.)                      |
|                                        | Complement C4 (mg/dL)                   | Turbidimetric immunoassay (measurements were performed by LSI Medience Corp.)                      |
|                                        | hs-CRP (mg/dL)                          | Nephelometric method (measurements were performed by LSI Medience Corp.)                           |
|                                        | IL-6 (pg/mL)                            | Chemiluminescence enzyme immunoassay (measurements were performed by LSI Medience Corp.)           |
|                                        | 8-OHdG (ng/mL)                          | Enzyme immunoassay (measurements were performed by LSI Medience Corp.)                             |
|                                        | White blood cell (cells/ $\mu$ L)       | Flow cytometry (measurements were performed by LSI Medience Corp.)                                 |
|                                        | Red blood cell ( $10^4$ cells/ $\mu$ L) | Electrical resistance detection (measurements were performed by LSI Medience Corp.)                |
|                                        | Hemoglobin (g/dL)                       | Sodium Lauryl Sulfate-hemoglobin method (measurements were performed by LSI Medience Corp.)        |
|                                        | Hematocrit (%)                          | Erythrocyte pulse wave height detection method (measurements were performed by LSI Medience Corp.) |

|                          |                                           |                                                                                          |
|--------------------------|-------------------------------------------|------------------------------------------------------------------------------------------|
|                          | Mean cell volume (fL)                     | Electrical resistance detection (measurements were performed by LSI Medience Corp.)      |
|                          | Mean corpuscular hemoglobin (pg)          | Electrical resistance detection (measurements were performed by LSI Medience Corp.)      |
|                          | Mean cell hemoglobin concentration (g/dL) | Electrical resistance detection (measurements were performed by LSI Medience Corp.)      |
|                          | Platelet (10 <sup>4</sup> cells/ $\mu$ L) | Electrical resistance detection (measurements were performed by LSI Medience Corp.)      |
| Iron metabolism          | Ferritin (ng/mL)                          | Chemiluminescence enzyme immunoassay (measurements were performed by LSI Medience Corp.) |
| Electrolyte              | Serum iron (mmol/L)                       | Colorimetric method (measurements were performed by LSI Medience Corp.)                  |
|                          | Blood sodium (mmol/L)                     | Electrode method (measurements were performed by LSI Medience Corp.)                     |
|                          | Blood potassium (mmol/L)                  | Electrode method (measurements were performed by LSI Medience Corp.)                     |
| Allergy                  | Total IgE (IU/mL)                         | Fluorescence enzyme immunoassay (measurements were performed by LSI Medience Corp.)      |
|                          | Anti-poaceae pollen IgE (UA/mL)           | Fluorescence enzyme immunoassay (measurements were performed by LSI Medience Corp.)      |
|                          | Anti-Weed IgE (UA/mL)                     | Fluorescence enzyme immunoassay (measurements were performed by LSI Medience Corp.)      |
|                          | Anti-House dust IgE (UA/mL)               | Fluorescence enzyme immunoassay (measurements were performed by LSI Medience Corp.)      |
|                          | Anti-Cedar pollen IgE (UA/mL)             | Fluorescence enzyme immunoassay (measurements were performed by LSI Medience Corp.)      |
| Rheumatoid arthritis     | Anti-CCP antibody (U/mL)                  | Fluorescence enzyme immunoassay (measurements were performed by LSI Medience Corp.)      |
| Pituitary gland function | Prolactin (ng/mL)                         | Chemiluminescence enzyme immunoassay (measurements were performed by LSI Medience Corp.) |
|                          | Follicle stimulating hormone (mIU/mL)     | Chemiluminescence enzyme immunoassay (measurements were performed by LSI Medience Corp.) |

|                                   |                                      |                                                                                                                                                                                                                                                                                                                                                                                   |
|-----------------------------------|--------------------------------------|-----------------------------------------------------------------------------------------------------------------------------------------------------------------------------------------------------------------------------------------------------------------------------------------------------------------------------------------------------------------------------------|
| Asthma/<br>airway<br>inflammation | Adrenocorticotrophic hormone (pg/mL) | Electrochemiluminescence immunoassay (measurements were performed by LSI Medience Corp.)                                                                                                                                                                                                                                                                                          |
|                                   | FVC (L)                              | Spirometer (HI-801, CHEST M.I., Inc., Tokyo, Japan)                                                                                                                                                                                                                                                                                                                               |
|                                   | FVC to predicted FVC ratio (%)       | Spirometer (HI-801, CHEST M.I., Inc.)                                                                                                                                                                                                                                                                                                                                             |
|                                   | FEV1 (L)                             | Spirometer (HI-801, CHEST M.I., Inc.)                                                                                                                                                                                                                                                                                                                                             |
|                                   | FEV1 to predicted FEV1 ratio (%)     | Spirometer (HI-801, CHEST M.I., Inc.)                                                                                                                                                                                                                                                                                                                                             |
|                                   | FEV1%G (%)                           | Spirometer (HI-801, CHEST M.I., Inc.)                                                                                                                                                                                                                                                                                                                                             |
|                                   | FEV1%G to predicted FEV1%G ratio (%) | Spirometer (HI-801, CHEST M.I., Inc.)                                                                                                                                                                                                                                                                                                                                             |
|                                   | MMF (L/s)                            | Spirometer (HI-801, CHEST M.I., Inc.)                                                                                                                                                                                                                                                                                                                                             |
|                                   | MMF to predicted MMF ratio (%)       | Spirometer (HI-801, CHEST M.I., Inc.)                                                                                                                                                                                                                                                                                                                                             |
|                                   | PEF (L/s)                            | Spirometer (HI-801, CHEST M.I., Inc.)                                                                                                                                                                                                                                                                                                                                             |
|                                   | PEF to predicted PEF ratio (%)       | Spirometer (HI-801, CHEST M.I., Inc.)                                                                                                                                                                                                                                                                                                                                             |
|                                   | PEF time (seconds)                   | Spirometer (HI-801, CHEST M.I., Inc.)                                                                                                                                                                                                                                                                                                                                             |
|                                   | FET (seconds)                        | Spirometer (HI-801, CHEST M.I., Inc.)                                                                                                                                                                                                                                                                                                                                             |
|                                   | EV (%)                               | Spirometer (HI-801, CHEST M.I., Inc.)                                                                                                                                                                                                                                                                                                                                             |
| Mental<br>health                  | Exhaled H <sub>2</sub> (ppm)         | TRI lyser mBA-3000 (measurements were performed by TAIYO Instruments INC. [Osaka, Japan])                                                                                                                                                                                                                                                                                         |
|                                   | Exhaled CH <sub>4</sub> (ppm)        | TRI lyser mBA-3000 (measurements were performed by TAIYO Instruments INC.)                                                                                                                                                                                                                                                                                                        |
|                                   | S-WHO-5 score (points)               | The S-WHO-5 score was evaluated with the questionnaire. It is a modified version of the WHO-5, a tool for assessing mental health status, established by Inagaki et al [133]. Specifically, the WHO-5 uses a 6-point scale to answer each question, while the S-WHO-5 uses a 4-point scale. Scores range from 0 to 15 points, with higher scores indicating better mental health. |

|                    |                      |                                                                                                                                                                                      |
|--------------------|----------------------|--------------------------------------------------------------------------------------------------------------------------------------------------------------------------------------|
| Depression         | CES-D score (points) | CES-D score was evaluated with the questionnaire, established by Radloff LS [134]. Scores range from 0 to 60 points, with higher scores indicating severe depressive symptoms.       |
| Cognitive function | MMSE score (points)  | MMSE score was evaluated with the questionnaire, established by Folstein et al [135]. Scores range from 0 to 30 points, with lower scores indicating decline of cognitive functions. |

---

baPWV, brachial-ankle pulse wave velocity; HOMA-IR, homeostasis model assessment-insulin resistance; HbA1c, Hemoglobin A1c; HDL, high-density lipoprotein; LDL, low-density lipoprotein; AST, aspartate aminotransferase; ALT, alanine aminotransferase;  $\gamma$ -GTP,  $\gamma$ -glutamyltransferase; Ig, immunoglobulin; hs-CRP, high-sensitivity C-reactive protein; IL, interleukin; 8-OHdG, 8-hydroxy-2-deoxyguanosine; CCP, cyclic citrullinated peptide; FVC, forced vital capacity; FEV, forced expiratory volume in one second; FEV1%G; FEV1/FVC; MMF, maximum mid-expiratory flow; PEF, peak expiratory flow; FET, Forced expiration time; EV, extrapolated volume; S-WHO-5, simplified Japanese version of the World Health Organization-Five Well-Being Index; CES-D, Center for Epidemiological Studies Depression; MMSE, Mini-Mental state examination



**Table S2.** Values of clinical markers and clinical scores of the participants.

| Category           | Variable                            | All subjects   |        |             | Male           |        |             | Female         |        |             |
|--------------------|-------------------------------------|----------------|--------|-------------|----------------|--------|-------------|----------------|--------|-------------|
|                    |                                     | Mean $\pm$ SD  | Median | IQR         | Mean $\pm$ SD  | Median | IQR         | Mean $\pm$ SD  | Median | IQR         |
| Obesity            | Body fat percentage (%)             | 26.1 $\pm$ 8.1 | 25.5   | 20.3 - 31.9 | 20.6 $\pm$ 5.8 | 20.5   | 16.8 - 23.7 | 30.2 $\pm$ 7.1 | 30.2   | 25.4 - 34.7 |
|                    | Body water content (kg)             | 31.4 $\pm$ 6.3 | 29.8   | 26.4 - 35.6 | 37.2 $\pm$ 5.0 | 36.9   | 33.9 - 40.0 | 27.2 $\pm$ 3.0 | 27.0   | 25.1 - 29.1 |
|                    | Visceral fat level (levels)         | 8.1 $\pm$ 4.3  | 8.0    | 5.0 - 11.0  | 11.3 $\pm$ 4.0 | 11.0   | 9.0 - 14.0  | 5.9 $\pm$ 2.9  | 6.0    | 4.0 - 8.0   |
|                    | Basal metabolic rate (kcal/day)     | 1260 $\pm$ 247 | 1190   | 1060 - 1420 | 1477 $\pm$ 205 | 1456   | 1339 - 1589 | 1097 $\pm$ 120 | 1084   | 1016 - 1162 |
|                    | Basal metabolic rate level (levels) | 10.0 $\pm$ 3.3 | 9.0    | 8.0 - 13.0  | 10.4 $\pm$ 3.0 | 10.0   | 9.0 - 13.0  | 9.6 $\pm$ 3.4  | 9.0    | 7.0 - 12.0  |
| Glucose metabolism | C peptide (ng/mL)                   | 1.3 $\pm$ 0.6  | 1.2    | 0.9 - 1.6   | 1.4 $\pm$ 0.6  | 1.3    | 1.0 - 1.7   | 1.3 $\pm$ 0.5  | 1.2    | 0.9 - 1.5   |
|                    | Glycoalbumin (%)                    | 14.4 $\pm$ 1.8 | 14.2   | 13.3 - 15.1 | 14.1 $\pm$ 2.2 | 13.7   | 12.9 - 14.8 | 14.6 $\pm$ 1.4 | 14.4   | 13.8 - 15.2 |
| Physical function  | Estimated bone mass (kg)            | 2.4 $\pm$ 0.4  | 2.4    | 2.1 - 2.8   | 2.8 $\pm$ 0.3  | 2.8    | 2.6 - 3.0   | 2.1 $\pm$ 0.3  | 2.1    | 1.9 - 2.3   |
|                    | Muscle mass (kg)                    | 41.9 $\pm$ 8.9 | 38.7   | 34.7 - 49.2 | 50.9 $\pm$ 6.0 | 50.4   | 47.0 - 54.4 | 35.4 $\pm$ 3.1 | 35.3   | 33.3 - 37.4 |
|                    | Right leg (kg)                      | 7.4 $\pm$ 1.9  | 6.9    | 6.0 - 8.7   | 9.1 $\pm$ 1.5  | 9.0    | 8.1 - 10.0  | 6.2 $\pm$ 0.8  | 6.1    | 5.7 - 6.7   |

|                |                          |             |      |             |             |      |             |             |      |             |
|----------------|--------------------------|-------------|------|-------------|-------------|------|-------------|-------------|------|-------------|
| Eyesight       | Left leg (kg)            | 7.3 ± 1.8   | 6.9  | 5.9 - 8.6   | 9.0 ± 1.5   | 8.9  | 7.9 - 9.9   | 6.1 ± 0.8   | 6.1  | 5.6 - 6.6   |
|                | Right arm (kg)           | 2.1 ± 0.6   | 1.9  | 1.7 - 2.6   | 2.7 ± 0.4   | 2.7  | 2.5 - 3.0   | 1.7 ± 0.2   | 1.7  | 1.6 - 1.8   |
|                | Left arm (kg)            | 2.1 ± 0.6   | 1.8  | 1.6 - 2.6   | 2.7 ± 0.4   | 2.6  | 2.4 - 2.9   | 1.6 ± 0.2   | 1.6  | 1.5 - 1.8   |
|                | Trunk (kg)               | 23.0 ± 4.3  | 21.5 | 19.6 - 26.9 | 27.4 ± 2.6  | 27.4 | 25.8 - 29.1 | 19.8 ± 1.6  | 19.9 | 18.7 - 20.9 |
|                | Locomo 25 score (points) | 6.9 ± 9.0   | 4.0  | 2.0 - 9.0   | 5.9 ± 7.8   | 3.0  | 1.0 - 7.0   | 7.6 ± 9.7   | 4.0  | 2.0 - 9.0   |
|                | Far-sightedness          | 1.1 ± 0.3   | 1.0  | 0.9 - 1.2   | 1.1 ± 0.3   | 1.2  | 0.9 - 1.5   | 1.0 ± 0.3   | 1.0  | 0.8 - 1.2   |
| Liver function | Near-sightedness         | 0.9 ± 0.4   | 0.9  | 0.7 - 1.2   | 0.9 ± 0.4   | 0.9  | 0.6 - 1.2   | 0.9 ± 0.3   | 0.9  | 0.7 - 1.2   |
|                | Albumin (g/dL)           | 4.5 ± 0.3   | 4.5  | 4.3 - 4.6   | 4.5 ± 0.3   | 4.5  | 4.3 - 4.7   | 4.4 ± 0.3   | 4.4  | 4.3 - 4.6   |
|                | AST (U/L)                | 23.4 ± 12.8 | 22.0 | 18.0 - 26.0 | 25.2 ± 9.1  | 23.0 | 19.0 - 28.0 | 22.2 ± 14.9 | 20.0 | 17.0 - 24.0 |
|                | ALT (U/L)                | 21.9 ± 15.5 | 18.0 | 14.0 - 24.0 | 26.5 ± 15.0 | 22.0 | 18.0 - 31.0 | 18.6 ± 15.0 | 16.0 | 12.0 - 20.0 |
|                | γ-GTP (U/L)              | 34.6 ± 47.1 | 22.0 | 15.0 - 38.0 | 49.6 ± 58.1 | 35.0 | 21.0 - 55.0 | 23.7 ± 33.4 | 17.0 | 13.0 - 25.0 |
| Renal function | Total bilirubin (mg/dL)  | 0.8 ± 0.3   | 0.8  | 0.6 - 1.0   | 0.9 ± 0.4   | 0.8  | 0.6 - 1.0   | 0.8 ± 0.3   | 0.8  | 0.6 - 1.0   |
|                | Total Protein (g/dL)     | 7.3 ± 0.4   | 7.3  | 7.1 - 7.6   | 7.3 ± 0.4   | 7.4  | 7.1 - 7.6   | 7.3 ± 0.4   | 7.3  | 7.1 - 7.6   |
|                | Creatinine (mg/dL)       | 0.7 ± 0.2   | 0.7  | 0.6 - 0.8   | 0.8 ± 0.1   | 0.8  | 0.7 - 0.9   | 0.6 ± 0.1   | 0.6  | 0.6 - 0.7   |

|                         |                                         |             |      |             |             |      |             |             |      |             |
|-------------------------|-----------------------------------------|-------------|------|-------------|-------------|------|-------------|-------------|------|-------------|
| Adrenal cortex function | Blood urea nitrogen (mg/dL)             | 14.7 ± 3.9  | 14.2 | 12.0 - 17.0 | 15.4 ± 4.1  | 14.9 | 12.6 - 17.7 | 14.1 ± 3.7  | 13.7 | 11.5 - 16.3 |
|                         | Plasma renin activity (ng/mL/hr)        | 2.1 ± 4.0   | 1.0  | 0.5 - 2.1   | 2.9 ± 5.6   | 1.4  | 0.7 - 2.8   | 1.4 ± 2.1   | 0.8  | 0.4 - 1.7   |
|                         | Urine albumin creatinine ratio (mg/gCr) | 30 ± 149    | 7    | 4 - 14      | 45 ± 216    | 5    | 3 - 13      | 20 ± 67     | 7    | 5 - 14      |
|                         | Aldosterone (pg/mL)                     | 116 ± 50    | 110  | 84 - 139    | 119 ± 46    | 115  | 88 - 141    | 115 ± 53    | 106  | 81 - 138    |
|                         | Cortisol (µg/dL)                        | 8.8 ± 3.1   | 8.4  | 6.6 - 10.5  | 9.6 ± 2.8   | 9.6  | 7.6 - 11.3  | 8.2 ± 3.1   | 7.6  | 6.1 - 9.6   |
| Cardiac function        | Brain natriuretic peptide (pg/mL)       | 13.1 ± 15.9 | 8.2  | 5.8 - 13.8  | 11.3 ± 12.7 | 6.2  | 5.8 - 11.0  | 14.4 ± 17.7 | 9.6  | 6.0 - 15.4  |
| Thyroid function        | Troponin I (pg/mL)                      | 5.9 ± 13.6  | 4.0  | 4.0 - 4.0   | 7.1 ± 20.1  | 4.0  | 4.0 - 4.2   | 5.1 ± 5.2   | 4.0  | 4.0 - 4.0   |
|                         | Free thyroxine (ng/dL)                  | 1.0 ± 0.2   | 1.0  | 1.0 - 1.1   | 1.0 ± 0.1   | 1.0  | 1.0 - 1.1   | 1.0 ± 0.2   | 1.0  | 1.0 - 1.1   |
|                         | Thyroid stimulating hormone (µIU/mL)    | 1.9 ± 1.7   | 1.5  | 1.1 - 2.2   | 1.8 ± 1.6   | 1.4  | 0.9 - 2.1   | 2.0 ± 1.7   | 1.6  | 1.1 - 2.3   |
| Sexual function         | Testosterone (ng/mL)                    | 2.8 ± 3.3   | 0.4  | 0.2 - 5.6   | 6.3 ± 2.0   | 6.2  | 4.9 - 7.6   | 0.3 ± 0.1   | 0.3  | 0.2 - 0.3   |
| Inflammation            | Neutrophil (%)                          | 54.8 ± 8.8  | 54.5 | 49.0 - 60.0 | 55.2 ± 8.7  | 55.0 | 49.5 - 60.0 | 54.5 ± 8.9  | 54.0 | 49.0 - 60.0 |

|                  |                          |             |      |             |             |      |             |             |      |             |
|------------------|--------------------------|-------------|------|-------------|-------------|------|-------------|-------------|------|-------------|
| Oxidative stress | Stab neutrophil (%)      | 2.0 ± 1.5   | 2.0  | 1.0 - 2.0   | 2.1 ± 1.5   | 2.0  | 1.0 - 2.8   | 2.0 ± 1.4   | 2.0  | 1.0 - 2.0   |
|                  | Segmented neutrophil (%) | 52.7 ± 8.7  | 52.0 | 47.0 - 58.0 | 53.0 ± 8.6  | 53.0 | 47.0 - 58.0 | 52.5 ± 8.8  | 52.0 | 47.0 - 58.0 |
|                  | Lymphocyte (%)           | 35.7 ± 8.2  | 36.0 | 30.0 - 41.0 | 34.7 ± 7.9  | 35.0 | 29.0 - 40.0 | 36.4 ± 8.3  | 36.0 | 31.0 - 42.0 |
|                  | Monocyte (%)             | 5.9 ± 2.0   | 6.0  | 4.0 - 7.0   | 6.2 ± 1.9   | 6.0  | 5.0 - 8.0   | 5.6 ± 2.0   | 5.5  | 4.0 - 7.0   |
|                  | Eosinophil (%)           | 3.0 ± 2.1   | 2.5  | 2.0 - 4.0   | 3.2 ± 2.1   | 3.0  | 2.0 - 4.0   | 2.8 ± 2.0   | 2.0  | 1.0 - 4.0   |
|                  | Basophil (%)             | 0.7 ± 0.6   | 1.0  | 0.0 - 1.0   | 0.6 ± 0.6   | 1.0  | 0.0 - 1.0   | 0.7 ± 0.6   | 1.0  | 0.0 - 1.0   |
|                  | IgG (mg/dL)              | 1220 ± 268  | 1200 | 1050 - 1380 | 1193 ± 270  | 1169 | 1004 - 1365 | 1248 ± 265  | 1230 | 1075 - 1386 |
|                  | IgA (mg/dL)              | 220 ± 91    | 208  | 154 - 270   | 234 ± 93    | 229  | 166 - 282   | 210 ± 88    | 199  | 146 - 260   |
|                  | IgM (mg/dL)              | 99 ± 55     | 88   | 64 - 122    | 89 ± 57     | 78   | 56 - 106    | 106 ± 53    | 96   | 68 - 131    |
|                  | Complement C3 (mg/dL)    | 101 ± 16    | 100  | 90 - 112    | 102 ± 16    | 100  | 91 - 113    | 101 ± 16    | 100  | 90 - 111    |
|                  | Complement C4 (mg/dL)    | 24.5 ± 6.8  | 24.0 | 20.0 - 29.0 | 24.5 ± 6.5  | 24.0 | 20.0 - 28.0 | 24.5 ± 7.0  | 24.0 | 20.0 - 29.0 |
|                  | hs-CRP (mg/dL)           | 0.06 ± 0.09 | 0.03 | 0.01 - 0.07 | 0.07 ± 0.08 | 0.03 | 0.02 - 0.08 | 0.06 ± 0.09 | 0.03 | 0.01 - 0.06 |
| Oxidative stress | IL-6 (pg/mL)             | 1.5 ± 4.0   | 0.9  | 0.6 - 1.3   | 1.6 ± 3.4   | 0.9  | 0.7 - 1.4   | 1.3 ± 4.4   | 0.8  | 0.6 - 1.2   |
|                  | 8-OHdG (ng/mL)           | 9.2 ± 4.1   | 8.6  | 6.4 - 10.8  | 8.7 ± 3.6   | 8.1  | 6.3 - 10.5  | 9.5 ± 4.5   | 8.9  | 6.6 - 11.1  |

|                    |                                           |                 |      |             |                 |      |             |                 |      |             |
|--------------------|-------------------------------------------|-----------------|------|-------------|-----------------|------|-------------|-----------------|------|-------------|
| Hematological test | White blood cell (cells/ $\mu$ L)         | 5630 $\pm$ 1620 | 5400 | 4600 - 6400 | 5973 $\pm$ 1590 | 5700 | 4900 - 6800 | 5389 $\pm$ 1598 | 5100 | 4400 - 6100 |
|                    | Red blood cell ( $10^4$ cells/ $\mu$ L)   | 462 $\pm$ 41    | 460  | 432 - 489   | 486 $\pm$ 38    | 488  | 461 - 511   | 444 $\pm$ 33    | 444  | 420 - 464   |
|                    | Hemoglobin (g/dL)                         | 14.1 $\pm$ 1.4  | 14.0 | 13.1 - 15.1 | 15.2 $\pm$ 1.0  | 15.2 | 14.5 - 15.9 | 13.3 $\pm$ 1.0  | 13.3 | 12.7 - 14.0 |
|                    | Hematocrit (%)                            | 44.6 $\pm$ 3.8  | 44.5 | 42.0 - 47.3 | 47.5 $\pm$ 3.0  | 47.6 | 45.6 - 49.4 | 42.6 $\pm$ 2.9  | 42.6 | 40.7 - 44.5 |
|                    | Mean cell volume (fL)                     | 97 $\pm$ 5      | 97   | 94 - 100    | 98 $\pm$ 4      | 98   | 94 - 100    | 96 $\pm$ 5      | 97   | 94 - 99     |
|                    | Mean corpuscular hemoglobin (pg)          | 30.6 $\pm$ 1.9  | 30.8 | 29.8 - 31.7 | 31.3 $\pm$ 1.5  | 31.2 | 30.3 - 32.2 | 30.0 $\pm$ 2.0  | 30.4 | 29.4 - 31.3 |
|                    | Mean cell hemoglobin concentration (g/dL) | 31.6 $\pm$ 0.9  | 31.6 | 31.0 - 32.1 | 32.0 $\pm$ 0.8  | 32.0 | 31.6 - 32.5 | 31.2 $\pm$ 0.9  | 31.3 | 30.8 - 31.8 |
|                    | Platelet ( $10^4$ cells/ $\mu$ L)         | 25.9 $\pm$ 5.7  | 25.2 | 21.9 - 29.1 | 25.5 $\pm$ 5.6  | 24.8 | 21.6 - 29.0 | 26.1 $\pm$ 5.8  | 25.3 | 22.0 - 29.4 |
| Iron metabolism    | Ferritin (ng/mL)                          | 97 $\pm$ 86     | 77   | 38 - 129    | 145 $\pm$ 94    | 124  | 88 - 175    | 62 $\pm$ 60     | 51   | 21 - 81     |
|                    | Serum iron (mmol/L)                       | 100 $\pm$ 40    | 96   | 74 - 123    | 107 $\pm$ 41    | 100  | 75 - 133    | 96 $\pm$ 38     | 93   | 74 - 117    |
| Electrolyte        | Blood sodium (mmol/L)                     | 142 $\pm$ 2     | 142  | 141 - 143   | 142 $\pm$ 2     | 142  | 141 - 143   | 142 $\pm$ 2     | 142  | 141 - 143   |
|                    | Blood potassium (mmol/L)                  | 4.0 $\pm$ 0.3   | 4.0  | 3.8 - 4.2   | 4.1 $\pm$ 0.3   | 4.1  | 3.9 - 4.3   | 4.0 $\pm$ 0.2   | 4.0  | 3.8 - 4.1   |
| Allergy            | Total IgE (IU/mL)                         | 137 $\pm$ 487   | 48   | 16 - 120    | 150 $\pm$ 287   | 55   | 19 - 145    | 128 $\pm$ 590   | 41   | 15 - 110    |

|                            |                                       |             |      |             |             |      |             |             |      |             |
|----------------------------|---------------------------------------|-------------|------|-------------|-------------|------|-------------|-------------|------|-------------|
| Rheumatoid arthritis       | Anti-poaceae pollen IgE (UA/mL)       | 1.8 ± 6.5   | 0.1  | 0.1 - 0.2   | 1.9 ± 6.3   | 0.1  | 0.1 - 0.4   | 1.6 ± 6.7   | 0.1  | 0.1 - 0.1   |
|                            | Anti-Weed IgE (UA/mL)                 | 0.4 ± 1.9   | 0.1  | 0.1 - 0.1   | 0.5 ± 2.5   | 0.1  | 0.1 - 0.1   | 0.4 ± 1.4   | 0.1  | 0.1 - 0.1   |
|                            | Anti-House dust IgE (UA/mL)           | 1.9 ± 5.9   | 0.1  | 0.1 - 0.5   | 1.8 ± 5.5   | 0.1  | 0.1 - 0.6   | 1.9 ± 6.2   | 0.1  | 0.1 - 0.4   |
|                            | Anti-Cedar pollen IgE (UA/mL)         | 4.3 ± 11.2  | 0.1  | 0.1 - 2.4   | 4.8 ± 12.5  | 0.2  | 0.1 - 2.6   | 4.0 ± 10.2  | 0.1  | 0.1 - 2.2   |
| Pituitary gland function   | Anti-CCP antibody (U/mL)              | 4.7 ± 54.6  | 0.5  | 0.5 - 0.5   | 2.0 ± 24.4  | 0.5  | 0.5 - 0.5   | 6.5 ± 68.5  | 0.5  | 0.5 - 0.5   |
|                            | Prolactin (ng/mL)                     | 8.7 ± 10.4  | 6.6  | 5.2 - 9.4   | 7.6 ± 12.6  | 6.3  | 4.9 - 8.2   | 9.5 ± 8.3   | 7.1  | 5.4 - 10.5  |
|                            | Follicle stimulating hormone (mIU/mL) | 25.3 ± 26.1 | 9.7  | 4.5 - 46.9  | 8.1 ± 9.4   | 5.3  | 3.7 - 9.2   | 37.6 ± 27.3 | 40.5 | 6.3 - 57.6  |
|                            | Adreno-corticotropic hormone (pg/mL)  | 23.2 ± 14.0 | 20.6 | 14.5 - 29.0 | 28.7 ± 15.1 | 25.9 | 19.2 - 33.9 | 19.3 ± 11.7 | 17.3 | 12.4 - 23.4 |
| Asthma/airway inflammation | FVC (L)                               | 3.4 ± 0.9   | 3.2  | 2.7 - 4.0   | 4.1 ± 0.8   | 4.1  | 3.6 - 4.6   | 2.9 ± 0.5   | 2.9  | 2.5 - 3.2   |
|                            | FVC to predicted FVC ratio (%)        | 112 ± 16    | 112  | 102 - 122   | 110 ± 16    | 112  | 102 - 121   | 113 ± 15    | 113  | 102 - 123   |

|                                               |             |      |             |             |      |             |             |      |             |
|-----------------------------------------------|-------------|------|-------------|-------------|------|-------------|-------------|------|-------------|
| FEV1<br>(L)                                   | 2.7 ± 0.7   | 2.6  | 2.2 - 3.2   | 3.2 ± 0.7   | 3.2  | 2.7 - 3.8   | 2.3 ± 0.5   | 2.3  | 2.0 - 2.6   |
| FEV1 to predicted<br>FEV1 ratio<br>(%)        | 108 ± 17    | 109  | 97 - 120    | 107 ± 16    | 108  | 97 - 117    | 110 ± 17    | 110  | 98 - 122    |
| FEV1%G<br>(%)                                 | 80.6 ± 7.5  | 80.9 | 76.5 - 85.1 | 79.2 ± 7.7  | 80.1 | 75.1 - 84.2 | 81.6 ± 7.1  | 81.5 | 77.5 - 85.8 |
| FEV1%G to<br>predicted<br>FEV1%G ratio<br>(%) | 107 ± 10    | 107  | 101 - 113   | 110 ± 11    | 110  | 104 - 117   | 105 ± 8     | 105  | 100 - 110   |
| MMF<br>(L/s)                                  | 2.8 ± 1.1   | 2.7  | 2.0 - 3.5   | 3.2 ± 1.2   | 3.2  | 2.4 - 3.9   | 2.5 ± 0.9   | 2.4  | 1.8 - 3.1   |
| MMF to predicted<br>MMF ratio<br>(%)          | 87 ± 28     | 84   | 68 - 105    | 82 ± 27     | 81   | 64 - 98     | 90 ± 28     | 85   | 70 - 108    |
| PEF<br>(L/s)                                  | 6.6 ± 2.1   | 6.3  | 5.2 - 7.9   | 8.2 ± 1.9   | 8.3  | 6.9 - 9.5   | 5.5 ± 1.2   | 5.6  | 4.8 - 6.3   |
| PEF to predicted<br>PEF ratio<br>(%)          | 78.5 ± 17.6 | 78.9 | 67.0 - 90.3 | 83.6 ± 18.6 | 84.5 | 70.6 - 95.9 | 74.8 ± 15.8 | 75.5 | 65.0 - 85.8 |
| PEF time<br>(seconds)                         | 0.11 ± 0.06 | 0.09 | 0.07 - 0.13 | 0.10 ± 0.05 | 0.08 | 0.06 - 0.12 | 0.12 ± 0.06 | 0.10 | 0.08 - 0.13 |
| FET<br>(seconds)                              | 8.2 ± 4.1   | 7.8  | 4.9 - 11.1  | 8.4 ± 4.1   | 8.0  | 5.1 - 11.3  | 8.0 ± 4.1   | 7.7  | 4.6 - 11.0  |
| EV<br>(%)                                     | 3.7 ± 1.5   | 3.4  | 2.8 - 4.3   | 3.5 ± 1.3   | 3.3  | 2.7 - 4.0   | 3.9 ± 1.6   | 3.5  | 2.9 - 4.4   |
| Exhaled H2<br>(ppm)                           | 11.7 ± 13.5 | 6.2  | 2.6 - 15.3  | 10.8 ± 11.5 | 6.2  | 2.7 - 14.9  | 12.4 ± 14.7 | 6.1  | 2.5 - 16.1  |

|                    |                                              |            |      |             |            |      |             |            |      |             |
|--------------------|----------------------------------------------|------------|------|-------------|------------|------|-------------|------------|------|-------------|
|                    | Exhaled CH4 (ppm)                            | 4.1 ± 8.4  | 2.2  | 2.0 - 2.6   | 3.6 ± 6.0  | 2.2  | 2.0 - 2.5   | 4.4 ± 9.8  | 2.2  | 2.0 - 2.6   |
| Mental health      | S-WHO-5 score (points)                       | 8.6 ± 2.9  | 9.0  | 6.0 - 10.0  | 8.6 ± 2.9  | 9.0  | 6.0 - 10.0  | 8.6 ± 2.8  | 9.0  | 7.0 - 10.0  |
| Depression         | CES-D score (points)                         | 9.6 ± 8.0  | 8.0  | 3.0 - 14.0  | 8.8 ± 7.7  | 8.0  | 3.0 - 12.0  | 10.1 ± 8.1 | 8.0  | 4.0 - 14.0  |
| Cognitive function | Mini-Mental state examination score (points) | 29.4 ± 1.2 | 30.0 | 29.0 - 30.0 | 29.3 ± 1.3 | 30.0 | 29.0 - 30.0 | 29.5 ± 1.1 | 30.0 | 29.0 - 30.0 |

---

baPWV, brachial-ankle pulse wave velocity; HOMA-IR, homeostasis model assessment-insulin resistance; HbA1c, Hemoglobin A1c; HDL, high-density lipoprotein; LDL, low-density lipoprotein; AST, aspartate aminotransferase; ALT, alanine aminotransferase;  $\gamma$ -GTP,  $\gamma$ -glutamyltransferase; Ig, immunoglobulin; hs-CRP, high-sensitivity C-reactive protein; IL, interleukin; 8-OHdG, 8-hydroxy-2-deoxyguanosine; CCP, cyclic citrullinated peptide; FVC, forced vital capacity; FEV, forced expiratory volume in one second; FEV1%G; FEV1/FVC; MMF, maximum mid-expiratory flow; PEF, peak expiratory flow; FET, Forced expiration time; EV, extrapolated volume; S-WHO-5, simplified Japanese version of the World Health Organization-Five Well-Being Index; CES-D, Center for Epidemiological Studies Depression; MMSE, Mini-Mental state examination



**Table S3.** The blood antioxidant concentration, food intake, and nutrition intake of the participants.

| Variable                                    | All subjects    |        |             | Male            |        |             | Female          |        |             |
|---------------------------------------------|-----------------|--------|-------------|-----------------|--------|-------------|-----------------|--------|-------------|
|                                             | Mean $\pm$ SD   | Median | IQR         | Mean $\pm$ SD   | Median | IQR         | Mean $\pm$ SD   | Median | IQR         |
| <b>Blood antioxidant</b>                    |                 |        |             |                 |        |             |                 |        |             |
| Total carotenoids ( $\mu\text{g/mL}$ )      | 1.23 $\pm$ 0.61 | 1.09   | 0.82 - 1.49 | 1.02 $\pm$ 0.55 | 0.89   | 0.69 - 1.16 | 1.39 $\pm$ 0.59 | 1.28   | 0.98 - 1.65 |
| Lutein ( $\mu\text{g/mL}$ )                 | 0.27 $\pm$ 0.13 | 0.24   | 0.18 - 0.32 | 0.25 $\pm$ 0.13 | 0.22   | 0.17 - 0.30 | 0.28 $\pm$ 0.13 | 0.25   | 0.20 - 0.33 |
| Zeaxanthin ( $\mu\text{g/mL}$ )             | 0.05 $\pm$ 0.02 | 0.05   | 0.04 - 0.06 | 0.05 $\pm$ 0.02 | 0.05   | 0.04 - 0.06 | 0.05 $\pm$ 0.02 | 0.04   | 0.04 - 0.06 |
| $\beta$ -Cryptoxanthin ( $\mu\text{g/mL}$ ) | 0.14 $\pm$ 0.09 | 0.12   | 0.08 - 0.17 | 0.11 $\pm$ 0.07 | 0.09   | 0.07 - 0.13 | 0.16 $\pm$ 0.09 | 0.14   | 0.10 - 0.19 |
| $\alpha$ -Carotene ( $\mu\text{g/mL}$ )     | 0.14 $\pm$ 0.14 | 0.10   | 0.07 - 0.16 | 0.12 $\pm$ 0.16 | 0.08   | 0.05 - 0.12 | 0.16 $\pm$ 0.13 | 0.13   | 0.09 - 0.18 |
| $\beta$ -Carotene ( $\mu\text{g/mL}$ )      | 0.41 $\pm$ 0.32 | 0.33   | 0.19 - 0.53 | 0.27 $\pm$ 0.26 | 0.19   | 0.12 - 0.33 | 0.51 $\pm$ 0.32 | 0.41   | 0.28 - 0.65 |
| Lycopene ( $\mu\text{g/mL}$ )               | 0.23 $\pm$ 0.14 | 0.20   | 0.13 - 0.29 | 0.21 $\pm$ 0.13 | 0.19   | 0.12 - 0.27 | 0.24 $\pm$ 0.15 | 0.22   | 0.15 - 0.29 |
| Vitamin A ( $\mu\text{g/mL}$ )              | 0.45 $\pm$ 0.15 | 0.44   | 0.35 - 0.53 | 0.53 $\pm$ 0.15 | 0.51   | 0.43 - 0.63 | 0.40 $\pm$ 0.12 | 0.38   | 0.31 - 0.47 |
| Vitamin C ( $\mu\text{g/mL}$ )              | 11.6 $\pm$ 4.3  | 11.1   | 8.9 - 13.9  | 10.1 $\pm$ 3.9  | 10.0   | 7.8 - 12.0  | 12.7 $\pm$ 4.3  | 12.3   | 10.1 - 14.9 |
| Vitamin E ( $\mu\text{g/mL}$ )              | 11.9 $\pm$ 3.4  | 11.4   | 9.9 - 13.3  | 12.0 $\pm$ 3.5  | 11.4   | 9.8 - 13.3  | 11.8 $\pm$ 3.3  | 11.4   | 9.9 - 13.2  |
| <b>Energy intake</b>                        |                 |        |             |                 |        |             |                 |        |             |

|                         |             |      |             |             |      |             |             |      |             |
|-------------------------|-------------|------|-------------|-------------|------|-------------|-------------|------|-------------|
| Energy (kcal)           | 1890 ± 589  | 1800 | 1490 - 2210 | 2197 ± 590  | 2115 | 1802 - 2539 | 1672 ± 481  | 1626 | 1367 - 1910 |
| <b>Nutrition intake</b> |             |      |             |             |      |             |             |      |             |
| Protein (g)             | 71.7 ± 14.7 | 71.1 | 63.2 - 79.1 | 78.0 ± 27.3 | 75.1 | 58.2 - 92.4 | 67.2 ± 24.9 | 63.8 | 50.2 - 78.1 |
| Fat (g)                 | 53.5 ± 12.0 | 53.6 | 46.4 - 61.3 | 57.0 ± 20.4 | 55.2 | 43.5 - 68.4 | 51.1 ± 17.9 | 49.0 | 38.8 - 61.4 |
| SFA (g)                 | 14.1 ± 3.8  | 14.2 | 11.8 - 16.3 | 15.0 ± 5.9  | 14.4 | 10.9 - 18.5 | 13.5 ± 5.1  | 12.9 | 9.9 - 16.3  |
| MUFA (g)                | 18.9 ± 4.6  | 18.9 | 16.1 - 21.8 | 20.2 ± 7.4  | 19.4 | 15.3 - 24.3 | 18.0 ± 6.5  | 17.2 | 13.6 - 22.0 |
| PUFA (g)                | 13.4 ± 3.1  | 13.3 | 11.4 - 15.3 | 14.3 ± 5.0  | 13.5 | 10.7 - 17.3 | 12.8 ± 4.5  | 12.4 | 9.6 - 15.3  |
| Cholesterol (mg)        | 380 ± 126   | 370  | 295 - 455   | 410 ± 191   | 391  | 272 - 506   | 358 ± 163   | 331  | 238 - 444   |
| Carbohydrate (g)        | 251 ± 37    | 254  | 229 - 275   | 293 ± 86    | 285  | 237 - 338   | 222 ± 67    | 217  | 179 - 257   |
| Total dietary fiber (g) | 11.2 ± 3.4  | 10.9 | 9.0 - 12.9  | 11.8 ± 4.9  | 10.9 | 8.4 - 14.7  | 10.7 ± 4.2  | 10.2 | 7.8 - 12.9  |
| Soluble (g)             | 2.8 ± 1.0   | 2.7  | 2.2 - 3.3   | 2.9 ± 1.4   | 2.7  | 1.9 - 3.6   | 2.7 ± 1.1   | 2.5  | 1.9 - 3.3   |
| Insoluble (g)           | 8.0 ± 2.3   | 7.9  | 6.5 - 9.2   | 8.5 ± 3.4   | 8.0  | 6.2 - 10.6  | 7.7 ± 3.0   | 7.3  | 5.6 - 9.3   |
| Sodium (mg)             | 4380 ± 892  | 4390 | 3850 - 4890 | 4942 ± 1579 | 4713 | 3801 - 5823 | 3972 ± 1345 | 3774 | 3141 - 4588 |

|                             |             |      |             |             |      |             |             |      |             |
|-----------------------------|-------------|------|-------------|-------------|------|-------------|-------------|------|-------------|
| Potassium (mg)              | 2350 ± 636  | 2280 | 1970 - 2700 | 2480 ± 922  | 2336 | 1861 - 2962 | 2250 ± 846  | 2123 | 1659 - 2681 |
| Calcium (mg)                | 505 ± 180   | 490  | 391 - 609   | 522 ± 242   | 471  | 352 - 666   | 493 ± 213   | 459  | 346 - 605   |
| Magnesium (mg)              | 252 ± 54    | 247  | 219 - 280   | 274 ± 91    | 266  | 209 - 324   | 236 ± 85    | 224  | 178 - 277   |
| Phosphorus (mg)             | 1060 ± 227  | 1050 | 929 - 1170  | 1151 ± 408  | 1088 | 864 - 1364  | 997 ± 371   | 936  | 746 - 1177  |
| Iron (mg)                   | 7.6 ± 1.9   | 7.4  | 6.5 - 8.6   | 8.1 ± 3.1   | 7.6  | 5.9 - 9.9   | 7.3 ± 2.8   | 6.7  | 5.3 - 8.8   |
| Zinc (mg)                   | 8.3 ± 1.3   | 8.3  | 7.6 - 8.9   | 9.1 ± 2.7   | 8.8  | 7.2 - 10.8  | 7.7 ± 2.5   | 7.3  | 5.9 - 9.0   |
| Copper (mg)                 | 1.2 ± 0.2   | 1.2  | 1.0 - 1.3   | 1.3 ± 0.4   | 1.2  | 1.0 - 1.5   | 1.1 ± 0.4   | 1.0  | 0.8 - 1.3   |
| Manganese (mg)              | 2.9 ± 0.7   | 2.8  | 2.4 - 3.3   | 3.2 ± 1.1   | 3.0  | 2.4 - 3.8   | 2.7 ± 1.0   | 2.5  | 2.0 - 3.3   |
| Retinol eq. (µg RE)         | 619 ± 337   | 563  | 412 - 782   | 664 ± 405   | 618  | 360 - 877   | 586 ± 370   | 506  | 359 - 747   |
| Vitamin D (µg)              | 15.4 ± 9.6  | 13.8 | 9.5 - 19.7  | 16.2 ± 12.2 | 12.9 | 7.8 - 20.7  | 14.9 ± 10.9 | 12.5 | 7.4 - 18.9  |
| α-Tocopherol (mg)           | 6.9 ± 1.9   | 6.8  | 5.8 - 8.0   | 7.2 ± 2.9   | 6.7  | 5.3 - 8.9   | 6.7 ± 2.6   | 6.2  | 4.9 - 8.0   |
| Vitamin K (µg)              | 315 ± 147   | 295  | 212 - 399   | 323 ± 175   | 296  | 195 - 432   | 310 ± 157   | 289  | 187 - 400   |
| Vitamin B <sub>1</sub> (mg) | 0.73 ± 0.17 | 0.71 | 0.63 - 0.82 | 0.77 ± 0.28 | 0.74 | 0.57 - 0.91 | 0.69 ± 0.25 | 0.65 | 0.52 - 0.82 |
| Vitamin B <sub>2</sub> (mg) | 1.3 ± 0.3   | 1.3  | 1.1 - 1.4   | 1.3 ± 0.5   | 1.3  | 1.0 - 1.6   | 1.2 ± 0.4   | 1.1  | 0.9 - 1.4   |
| Niacin (mg)                 | 17.8 ± 4.9  | 17.2 | 14.8 - 20.6 | 19.7 ± 7.6  | 18.8 | 14.8 - 23.5 | 16.5 ± 6.9  | 15.2 | 11.9 - 19.7 |

|                                     |             |      |             |             |      |             |             |      |             |
|-------------------------------------|-------------|------|-------------|-------------|------|-------------|-------------|------|-------------|
| Vitamin B <sub>6</sub><br>(mg)      | 1.2 ± 0.3   | 1.2  | 1.1 - 1.4   | 1.4 ± 0.5   | 1.3  | 1.0 - 1.6   | 1.2 ± 0.5   | 1.1  | 0.8 - 1.4   |
| Vitamin B <sub>12</sub><br>(µg)     | 10.6 ± 5.8  | 9.9  | 7.1 - 13.2  | 11.4 ± 7.6  | 9.5  | 6.3 - 14.5  | 10.0 ± 6.8  | 8.4  | 5.5 - 12.5  |
| Folate<br>(µg)                      | 292 ± 99    | 278  | 228 - 340   | 307 ± 130   | 291  | 217 - 373   | 281 ± 119   | 259  | 200 - 348   |
| Pantothenic acid<br>(mg)            | 6.5 ± 1.3   | 6.5  | 5.7 - 7.3   | 7.0 ± 2.3   | 6.8  | 5.4 - 8.3   | 6.1 ± 2.1   | 5.8  | 4.6 - 7.2   |
| Alcohol<br>(g)                      | 12.5 ± 19.9 | 7.6  | 1.6 - 16.6  | 23.3 ± 27.0 | 16.6 | 0.9 - 35.1  | 4.8 ± 11.4  | 0.0  | 0.0 - 3.8   |
| <b>Food intake</b>                  |             |      |             |             |      |             |             |      |             |
| <b>Cereals</b>                      |             |      |             |             |      |             |             |      |             |
| Bread<br>(g)                        | 33.2 ± 28.0 | 26.0 | 13.0 - 49.9 | 35.2 ± 32.8 | 28.9 | 10.4 - 57.7 | 31.7 ± 26.0 | 22.5 | 10.0 - 50.0 |
| Buckwheat<br>noodles<br>(g)         | 21.9 ± 25.2 | 16.5 | 7.6 - 28.2  | 28.7 ± 33.2 | 20.8 | 9.7 - 52.0  | 17.1 ± 21.2 | 9.3  | 7.5 - 20.0  |
| Japanese<br>wheat<br>noodles<br>(g) | 20.4 ± 21.3 | 14.9 | 8.2 - 23.8  | 24.4 ± 25.6 | 20.8 | 9.7 - 25.4  | 17.4 ± 19.1 | 9.3  | 7.5 - 20.0  |
| Chinese<br>noodles<br>(g)           | 24.4 ± 26.2 | 17.5 | 9.6 - 29.5  | 36.0 ± 33.6 | 23.1 | 11.9 - 57.7 | 16.0 ± 18.6 | 9.3  | 7.5 - 20.0  |
| Spaghetti<br>and<br>macaroni<br>(g) | 12.9 ± 13.8 | 11.2 | 4.7 - 17.7  | 14.9 ± 16.8 | 10.8 | 0.0 - 23.1  | 11.4 ± 13.3 | 8.4  | 0.0 - 18.0  |

|                                                 |             |      |             |             |      |             |             |      |             |
|-------------------------------------------------|-------------|------|-------------|-------------|------|-------------|-------------|------|-------------|
| Rice<br>(g)                                     | 323 ± 122   | 321  | 244 - 404   | 388 ± 164   | 405  | 300 - 450   | 276 ± 116   | 260  | 208 - 351   |
| <b>Potatoes</b>                                 |             |      |             |             |      |             |             |      |             |
| Potatoes<br>(g)                                 | 34.0 ± 28.7 | 25.0 | 15.1 - 51.3 | 35.5 ± 33.4 | 23.1 | 11.9 - 57.7 | 32.8 ± 28.0 | 20.0 | 10.3 - 50.0 |
| <b>Sugars<br/>and<br/>sweeteners</b>            |             |      |             |             |      |             |             |      |             |
| Sugar<br>(g)                                    | 2.5 ± 4.2   | 0.5  | 0.0 - 3.8   | 3.0 ± 4.7   | 0.0  | 0.0 - 5.5   | 2.1 ± 3.8   | 0.0  | 0.0 - 2.8   |
| Cooking<br>sugar<br>(g)                         | 3.2 ± 1.9   | 2.9  | 1.6 - 4.5   | 3.4 ± 2.2   | 3.2  | 1.5 - 5.0   | 3.0 ± 1.8   | 2.8  | 1.5 - 4.3   |
| <b>Pulses</b>                                   |             |      |             |             |      |             |             |      |             |
| Tofu/Deep<br>fried<br>tofu<br>(g)               | 46.6 ± 35.0 | 38.0 | 21.1 - 67.8 | 42.3 ± 33.8 | 36.3 | 16.1 - 48.4 | 49.6 ± 37.4 | 34.9 | 31.4 - 69.8 |
| Natto<br>(g)                                    | 21.5 ± 17.2 | 17.4 | 8.4 - 34.7  | 22.4 ± 19.2 | 18.6 | 7.4 - 37.1  | 20.9 ± 17.0 | 16.1 | 5.8 - 35.4  |
| <b>Vegetables</b>                               |             |      |             |             |      |             |             |      |             |
| Pickled<br>green<br>leaves<br>vegetables<br>(g) | 7.7 ± 9.3   | 5.0  | 1.8 - 10.8  | 8.6 ± 10.4  | 4.2  | 1.6 - 10.4  | 7.0 ± 9.2   | 3.3  | 0.0 - 9.0   |
| Other<br>pickled<br>vegetables<br>(g)           | 8.2 ± 10.5  | 4.8  | 1.9 - 10.7  | 8.8 ± 11.5  | 3.8  | 1.6 - 10.4  | 7.7 ± 10.4  | 3.3  | 1.4 - 9.0   |

|                                                  |             |      |             |             |      |             |             |      |             |
|--------------------------------------------------|-------------|------|-------------|-------------|------|-------------|-------------|------|-------------|
| Raw<br>lettuces/cabbage<br>(g)                   | 25.8 ± 18.9 | 21.4 | 12.4 - 35.7 | 26.2 ± 20.1 | 20.9 | 8.3 - 37.9  | 25.6 ± 19.3 | 18.1 | 14.8 - 36.1 |
| Green<br>leaves<br>vegetables<br>(g)             | 30.4 ± 30.8 | 25.2 | 11.1 - 34.8 | 29.0 ± 32.8 | 14.6 | 6.8 - 33.2  | 31.4 ± 30.0 | 25.9 | 11.5 - 34.5 |
| Cabbage/Chinese<br>cabbage<br>(g)                | 31.0 ± 23.9 | 27.9 | 15.2 - 36.8 | 31.1 ± 26.2 | 29.9 | 13.3 - 36.5 | 30.9 ± 24.5 | 25.9 | 11.5 - 34.5 |
| Carrots/pumpkin<br>(g)                           | 16.3 ± 13.8 | 15.0 | 6.7 - 19.6  | 14.4 ± 13.7 | 8.3  | 3.9 - 19.0  | 17.6 ± 14.3 | 14.8 | 6.6 - 19.7  |
| Japanese<br>radish/turnip<br>(g)                 | 14.7 ± 16.4 | 10.7 | 5.9 - 21.6  | 14.9 ± 17.0 | 11.4 | 5.3 - 25.6  | 14.6 ± 17.3 | 8.9  | 4.6 - 22.2  |
| Other<br>root<br>vegetables<br>(g)               | 29.9 ± 23.5 | 25.3 | 14.4 - 40.8 | 28.5 ± 25.6 | 25.6 | 10.2 - 31.3 | 30.9 ± 23.6 | 24.6 | 19.7 - 44.4 |
| Tomatoes<br>(g)                                  | 23.9 ± 24.7 | 15.7 | 7.8 - 30.3  | 23.2 ± 25.9 | 12.5 | 5.3 - 31.3  | 24.4 ± 25.0 | 19.7 | 5.1 - 29.6  |
| <b>Fruits</b>                                    |             |      |             |             |      |             |             |      |             |
| Citrus<br>fruit<br>(g)                           | 10.6 ± 18.1 | 6.0  | 1.0 - 12.9  | 9.9 ± 18.8  | 6.9  | 0.0 - 14.8  | 11.1 ± 17.8 | 6.0  | 0.0 - 12.9  |
| Persimmons/<br>strawberries/<br>kiwifruit<br>(g) | 8.3 ± 14.2  | 6.0  | 0.1 - 7.1   | 6.4 ± 11.2  | 0.0  | 0.0 - 6.9   | 9.7 ± 15.8  | 6.0  | 0.0 - 12.9  |

|                                    |             |      |            |             |      |            |             |      |            |
|------------------------------------|-------------|------|------------|-------------|------|------------|-------------|------|------------|
| Other fruit (g)                    | 35.1 ± 38.8 | 20.0 | 8.5 - 55.0 | 33.7 ± 39.4 | 14.8 | 6.9 - 37.1 | 36.1 ± 39.6 | 32.1 | 6.0 - 64.3 |
| 100% fruit and vegetable juice (g) | 38.9 ± 68.9 | 17.3 | 3.4 - 47.9 | 49.6 ± 89.9 | 15.4 | 0.0 - 82.5 | 31.3 ± 51.7 | 13.3 | 0.0 - 28.6 |
| Seasonal citrus (g)                | 11.2 ± 12.2 | 8.2  | 2.2 - 16.6 | 9.6 ± 11.6  | 3.7  | 1.7 - 9.3  | 12.4 ± 12.4 | 8.0  | 3.2 - 16.1 |
| Seasonal persimmon (g)             | 6.3 ± 10.3  | 2.0  | 0.3 - 8.4  | 4.8 ± 9.6   | 1.7  | 0.0 - 3.7  | 7.4 ± 10.7  | 1.5  | 0.0 - 8.0  |
| Seasonal strawberry (g)            | 7.5 ± 10.5  | 3.2  | 2.2 - 12.1 | 6.2 ± 9.5   | 2.7  | 2.7 - 5.8  | 8.5 ± 11.1  | 5.0  | 2.3 - 12.5 |
| <b>Mushroom</b>                    |             |      |            |             |      |            |             |      |            |
| Mushrooms (g)                      | 10.4 ± 9.0  | 9.6  | 4.3 - 12.4 | 9.3 ± 8.1   | 5.2  | 4.0 - 11.9 | 11.3 ± 9.8  | 9.2  | 4.1 - 12.3 |
| <b>Algae</b>                       |             |      |            |             |      |            |             |      |            |
| Seaweeds (g)                       | 11.7 ± 10.8 | 8.9  | 4.9 - 14.7 | 12.0 ± 12.3 | 6.3  | 3.2 - 15.7 | 11.4 ± 10.7 | 11.1 | 4.4 - 13.6 |
| <b>Fish and shellfish</b>          |             |      |            |             |      |            |             |      |            |

|                                                   |             |      |             |             |      |             |             |      |             |
|---------------------------------------------------|-------------|------|-------------|-------------|------|-------------|-------------|------|-------------|
| Squid/<br>octopus/<br>shrimp/<br>shellfish<br>(g) | 14.4 ± 15.2 | 11.2 | 6.6 - 17.1  | 16.8 ± 16.0 | 13.7 | 7.1 - 16.7  | 12.6 ± 16.2 | 6.7  | 5.5 - 13.1  |
| Small<br>fish<br>with<br>bones<br>(g)             | 7.8 ± 12.8  | 5.2  | 1.4 - 9.2   | 8.4 ± 13.1  | 5.3  | 0.0 - 10.2  | 7.4 ± 13.4  | 4.1  | 0.0 - 8.9   |
| Canned<br>tuna<br>(g)                             | 3.7 ± 5.5   | 2.8  | 0.6 - 4.6   | 3.7 ± 6.1   | 3.2  | 0.0 - 3.9   | 3.7 ± 5.5   | 2.8  | 0.0 - 3.7   |
| Dried<br>fish/salted<br>fish<br>(g)               | 22.2 ± 21.9 | 17.7 | 9.8 - 30.2  | 21.9 ± 25.1 | 13.2 | 6.8 - 33.0  | 22.4 ± 22.9 | 12.6 | 6.4 - 28.6  |
| Oily<br>fish<br>(g)                               | 19.7 ± 18.0 | 15.8 | 9.2 - 28.4  | 22.1 ± 21.4 | 15.2 | 7.1 - 34.2  | 18.0 ± 19.0 | 11.8 | 6.1 - 29.6  |
| Lean<br>fish<br>(g)                               | 20.2 ± 18.1 | 16.0 | 9.7 - 30.2  | 22.2 ± 21.8 | 15.2 | 7.8 - 34.2  | 18.8 ± 17.5 | 13.1 | 6.1 - 29.6  |
| Raw<br>fish<br>(g)                                | 24.2 ± 24.0 | 18.6 | 10.3 - 30.5 | 29.0 ± 29.4 | 20.0 | 10.6 - 36.5 | 20.7 ± 21.6 | 14.4 | 8.3 - 25.8  |
| Grilled<br>fish<br>(g)                            | 45.0 ± 35.8 | 37.6 | 21.1 - 59.8 | 44.9 ± 40.8 | 34.3 | 18.3 - 59.1 | 45.0 ± 36.6 | 36.7 | 18.5 - 60.0 |



|                       |             |      |             |             |      |             |             |      |             |
|-----------------------|-------------|------|-------------|-------------|------|-------------|-------------|------|-------------|
| Boiled fish (g)       | 52.4 ± 50.9 | 36.3 | 18.9 - 77.8 | 57.7 ± 59.1 | 35.5 | 16.6 - 87.5 | 48.5 ± 48.9 | 28.7 | 14.2 - 72.8 |
| Fried fish (g)        | 18.6 ± 16.9 | 16.4 | 8.2 - 25.3  | 22.1 ± 20.1 | 17.7 | 8.3 - 31.3  | 16.0 ± 17.2 | 12.5 | 6.3 - 21.0  |
| <b>Meat</b>           |             |      |             |             |      |             |             |      |             |
| Chicken (g)           | 25.8 ± 20.5 | 22.0 | 12.9 - 34.3 | 27.6 ± 23.1 | 17.1 | 12.8 - 35.6 | 24.5 ± 20.7 | 24.6 | 11.1 - 30.8 |
| Pork/beef (g)         | 34.6 ± 21.7 | 32.6 | 20.1 - 39.7 | 37.4 ± 24.4 | 35.6 | 22.8 - 39.1 | 32.6 ± 21.6 | 30.8 | 14.8 - 33.9 |
| Ham/sausage/bacon (g) | 9.1 ± 8.1   | 7.4  | 4.0 - 12.3  | 10.0 ± 9.2  | 9.9  | 2.5 - 13.6  | 8.4 ± 8.2   | 4.7  | 2.2 - 10.7  |
| Liver (g)             | 0.9 ± 2.0   | 0.2  | -0.1 - 2.2  | 1.2 ± 2.2   | 0.0  | 0.0 - 2.8   | 0.7 ± 1.9   | 0.0  | 0.0 - 0.0   |
| Grilled meat (g)      | 15.1 ± 18.0 | 11.3 | 4.0 - 19.0  | 17.7 ± 19.7 | 11.7 | 5.6 - 23.0  | 13.2 ± 17.6 | 9.0  | 0.0 - 16.1  |
| Hamburg steak (g)     | 29.0 ± 24.4 | 22.3 | 14.6 - 37.7 | 32.2 ± 25.6 | 25.1 | 16.3 - 42.3 | 26.7 ± 23.8 | 19.0 | 13.1 - 34.1 |
| Fried meat (g)        | 23.6 ± 19.4 | 18.9 | 11.3 - 30.2 | 27.2 ± 21.5 | 21.9 | 12.4 - 35.7 | 21.0 ± 19.1 | 15.3 | 9.6 - 26.7  |
| Stir fry meat (g)     | 63.2 ± 41.5 | 58.0 | 33.3 - 82.6 | 61.5 ± 42.5 | 57.1 | 29.2 - 82.2 | 64.5 ± 42.4 | 57.0 | 33.6 - 83.2 |

|                                  |             |      |              |              |      |              |             |      |              |
|----------------------------------|-------------|------|--------------|--------------|------|--------------|-------------|------|--------------|
| Simmered meat (g)                | 99.7 ± 74.7 | 87.0 | 37.3 - 148.0 | 107.4 ± 82.8 | 90.6 | 38.2 - 161.3 | 94.2 ± 69.5 | 82.9 | 34.2 - 141.3 |
| <b>Eggs</b>                      |             |      |              |              |      |              |             |      |              |
| Egg (g)                          | 40.0 ± 23.3 | 35.8 | 23.8 - 54.5  | 44.1 ± 29.3  | 29.9 | 24.5 - 59.9  | 37.0 ± 23.4 | 25.9 | 21.2 - 51.9  |
| <b>Milk and dairy products</b>   |             |      |              |              |      |              |             |      |              |
| Low fat milk (g)                 | 33.7 ± 63.1 | 3.3  | -0.3 - 48.7  | 34.7 ± 68.3  | 0.0  | 0.0 - 27.2   | 32.9 ± 59.3 | 0.0  | 0.0 - 48.2   |
| Milk (g)                         | 69.5 ± 79.4 | 44.7 | 8.1 - 133.0  | 66.9 ± 90.3  | 22.3 | 0.0 - 123.7  | 71.4 ± 72.3 | 53.6 | 0.0 - 135.0  |
| Ice cream (g)                    | 18.1 ± 25.5 | 10.9 | 3.4 - 19.5   | 20.6 ± 30.0  | 9.2  | 0.0 - 19.8   | 16.3 ± 22.8 | 8.0  | 0.0 - 17.1   |
| <b>Fats and oils</b>             |             |      |              |              |      |              |             |      |              |
| Cooking oil (g)                  | 11.0 ± 4.8  | 10.6 | 7.7 - 13.8   | 11.8 ± 5.8   | 11.3 | 7.9 - 15.9   | 10.5 ± 4.9  | 9.8  | 7.0 - 13.4   |
| <b>Confectioneries</b>           |             |      |              |              |      |              |             |      |              |
| Western-type confectioneries (g) | 20.8 ± 21.9 | 15.0 | 7.1 - 28.6   | 19.7 ± 24.6  | 11.5 | 5.4 - 28.9   | 21.6 ± 22.0 | 10.0 | 4.7 - 25.0   |

|                                         |              |      |             |             |      |            |              |      |            |
|-----------------------------------------|--------------|------|-------------|-------------|------|------------|--------------|------|------------|
| Japanese-type<br>confectioneries<br>(g) | 7.6 ± 9.5    | 5.2  | 2.3 - 9.1   | 6.6 ± 8.6   | 3.8  | 0.0 - 8.2  | 8.3 ± 10.7   | 3.3  | 3.3 - 7.1  |
| Rice<br>cracker/rice<br>cake<br>(g)     | 17.6 ± 15.2  | 15.0 | 7.8 - 23.4  | 18.3 ± 18.0 | 20.6 | 6.0 - 20.6 | 17.1 ± 15.5  | 17.9 | 7.1 - 17.9 |
| <b>Alcoholic<br/>beverage</b>           |              |      |             |             |      |            |              |      |            |
| Sake<br>(g)                             | 12.5 ± 47.5  | 3.5  | -3.5 - 10.8 | 26.6 ± 68.9 | 0.0  | 0.0 - 0.0  | 2.4 ± 20.8   | 0.0  | 0.0 - 0.0  |
| Beer<br>(g)                             | 125 ± 257    | 49   | 5 - 139     | 220 ± 325   | 68   | 0 - 271    | 57 ± 180     | 0    | 0 - 16     |
| Shochu<br>(g)                           | 19.0 ± 46.2  | 6.4  | -2.1 - 16.8 | 35.4 ± 63.6 | 0.0  | 0.0 - 43.4 | 7.1 ± 26.5   | 0.0  | 0.0 - 0.0  |
| Whiskey<br>(g)                          | 3.3 ± 16.1   | 0.7  | -1.2 - 2.3  | 6.8 ± 23.6  | 0.0  | 0.0 - 0.0  | 0.7 ± 6.6    | 0.0  | 0.0 - 0.0  |
| Wine<br>(g)                             | 6.0 ± 26.4   | 1.5  | -2.3 - 5.0  | 8.8 ± 34.6  | 0.0  | 0.0 - 0.0  | 3.9 ± 19.6   | 0.0  | 0.0 - 0.0  |
| <b>Non-alcoholic<br/>beverage</b>       |              |      |             |             |      |            |              |      |            |
| Green<br>tea<br>(g)                     | 141 ± 170    | 69   | 20 - 168    | 134 ± 177   | 62   | 12 - 173   | 146 ± 168    | 107  | 10 - 150   |
| Black<br>tea/oolong<br>tea<br>(g)       | 43.4 ± 101.0 | 6.2  | 0.7 - 25.4  | 37.5 ± 93.8 | 0.0  | 0.0 - 24.7 | 47.6 ± 105.9 | 10.0 | 0.0 - 21.4 |
| Coffee<br>(g)                           | 235 ± 180    | 170  | 90 - 392    | 258 ± 203   | 173  | 62 - 433   | 219 ± 163    | 150  | 107 - 375  |

|                                      |           |     |           |           |     |            |           |     |           |
|--------------------------------------|-----------|-----|-----------|-----------|-----|------------|-----------|-----|-----------|
| Cola<br>drink/soft<br>drink<br>(g)   | 73 ± 121  | 42  | 13 - 96   | 111 ± 160 | 82  | 15 - 165   | 45 ± 85   | 13  | 0 - 71    |
| <b>Seasonings<br/>and<br/>spices</b> |           |     |           |           |     |            |           |     |           |
| Mayonnaise/dressing<br>(g)           | 6.2 ± 4.6 | 5.4 | 3.1 - 9.1 | 6.4 ± 5.3 | 5.8 | 2.3 - 10.4 | 6.0 ± 4.5 | 5.0 | 2.2 - 9.0 |
| Miso<br>soup<br>(g)                  | 165 ± 108 | 141 | 94 - 233  | 199 ± 132 | 152 | 125 - 277  | 141 ± 99  | 108 | 60 - 216  |
| Noodle<br>soup<br>(g)                | 94 ± 70   | 79  | 50 - 122  | 124 ± 93  | 97  | 59 - 165   | 72 ± 59   | 56  | 34 - 94   |
| Soy<br>sauce<br>(g)                  | 1.6 ± 0.4 | 1.6 | 1.3 - 1.9 | 1.9 ± 0.5 | 1.8 | 1.5 - 2.2  | 1.4 ± 0.4 | 1.4 | 1.2 - 1.6 |
| Cooking<br>salt<br>(g)               | 3.4 ± 1.0 | 3.5 | 2.8 - 4.0 | 3.7 ± 1.3 | 3.6 | 2.8 - 4.4  | 3.2 ± 1.1 | 3.2 | 2.5 - 3.8 |

---

SFA; saturated fatty acid, MUFA; mono-unsaturated fatty acid, PUFA; poly-unsaturated fatty acid, eq.; equivalent

**Table S4.** Relative abundance (%) of each gut bacterium of the participants.

| Variable                     | All subjects    |        |             | Male            |        |             | Female         |        |             |
|------------------------------|-----------------|--------|-------------|-----------------|--------|-------------|----------------|--------|-------------|
|                              | Mean $\pm$ SD   | Median | IQR         | Mean $\pm$ SD   | Median | IQR         | Mean $\pm$ SD  | Median | IQR         |
| phylum<br>Actinobacteria     | 13.3 $\pm$ 10.0 | 10.8   | 5.9 - 18.2  | 13.4 $\pm$ 10.3 | 10.8   | 6.1 - 18.0  | 13.3 $\pm$ 9.8 | 10.9   | 5.7 - 18.3  |
| class<br>Actinobacteria      | 13.3 $\pm$ 10.0 | 10.8   | 5.9 - 18.2  | 13.4 $\pm$ 10.3 | 10.8   | 6.1 - 18.0  | 13.3 $\pm$ 9.8 | 10.9   | 5.7 - 18.3  |
| order<br>Bifidobacteriales   | 7.6 $\pm$ 8.2   | 5.0    | 1.5 - 11.0  | 7.3 $\pm$ 8.6   | 4.2    | 1.4 - 10.2  | 7.8 $\pm$ 7.9  | 5.5    | 1.5 - 11.6  |
| family<br>Bifidobacteriaceae | 7.6 $\pm$ 8.2   | 5.0    | 1.5 - 11.0  | 7.3 $\pm$ 8.6   | 4.2    | 1.4 - 10.2  | 7.8 $\pm$ 7.9  | 5.5    | 1.5 - 11.6  |
| genus<br>Bifidobacterium     | 7.6 $\pm$ 8.2   | 5.0    | 1.5 - 11.0  | 7.3 $\pm$ 8.6   | 4.2    | 1.4 - 10.2  | 7.8 $\pm$ 7.9  | 5.5    | 1.5 - 11.6  |
| class<br>Coriobacteriia      | NA              | NA     | NA          | NA              | NA     | NA          | NA             | NA     | NA          |
| order<br>Coriobacteriales    | 5.7 $\pm$ 4.9   | 5.0    | 1.3 - 8.5   | 6.1 $\pm$ 4.7   | 5.7    | 2.1 - 8.7   | 5.3 $\pm$ 4.9  | 4.3    | 1.1 - 8.1   |
| family<br>Coriobacteriaceae  | 5.7 $\pm$ 4.9   | 5.0    | 1.3 - 8.5   | 6.1 $\pm$ 4.7   | 5.7    | 2.1 - 8.7   | 5.3 $\pm$ 4.9  | 4.3    | 1.1 - 8.1   |
| genus<br>Collinsella         | 4.9 $\pm$ 4.7   | 4.2    | 0.5 - 7.6   | 5.4 $\pm$ 4.5   | 5.0    | 1.6 - 8.0   | 4.6 $\pm$ 4.8  | 3.8    | 0.0 - 7.2   |
| phylum<br>Bacteroidetes      | 21.1 $\pm$ 10.2 | 19.0   | 14.2 - 26.8 | 22.6 $\pm$ 11.3 | 20.4   | 15.4 - 29.4 | 20.0 $\pm$ 9.3 | 18.3   | 13.9 - 24.6 |
| class<br>Bacteroidia         | 21.0 $\pm$ 10.3 | 19.0   | 14.2 - 26.8 | 22.5 $\pm$ 11.3 | 20.4   | 15.4 - 29.3 | 20.0 $\pm$ 9.3 | 18.2   | 13.8 - 24.6 |
| order<br>Bacteroidales       | 21.0 $\pm$ 10.3 | 19.0   | 14.2 - 26.8 | 22.5 $\pm$ 11.3 | 20.4   | 15.4 - 29.3 | 20.0 $\pm$ 9.3 | 18.2   | 13.8 - 24.6 |
| family<br>Prevotellaceae     | 6.5 $\pm$ 11.4  | 0.1    | 0.0 - 8.4   | 9.2 $\pm$ 13.3  | 0.9    | 0.0 - 16.8  | 4.6 $\pm$ 9.4  | 0.0    | 0.0 - 3.3   |

|                              |             |      |             |             |      |             |             |      |             |
|------------------------------|-------------|------|-------------|-------------|------|-------------|-------------|------|-------------|
| genus<br>Prevotella          | 5.9 ± 10.9  | 0.0  | 0.0 - 7.3   | 8.4 ± 12.7  | 0.0  | 0.0 - 15.4  | 4.1 ± 9.1   | 0.0  | 0.0 - 2.6   |
| family<br>Bacteroidaceae     | 10.9 ± 7.2  | 10.0 | 5.1 - 15.3  | 10.5 ± 7.3  | 9.3  | 4.7 - 15.3  | 11.2 ± 7.2  | 10.4 | 5.4 - 15.3  |
| genus<br>Bacteroides         | 10.9 ± 7.2  | 10.0 | 5.1 - 15.3  | 10.5 ± 7.3  | 9.3  | 4.7 - 15.3  | 11.2 ± 7.2  | 10.4 | 5.4 - 15.3  |
| family<br>Rikenellaceae      | 2.1 ± 2.8   | 1.1  | 0.1 - 2.9   | 1.4 ± 2.1   | 0.5  | 0.1 - 1.9   | 2.6 ± 3.1   | 1.6  | 0.3 - 3.7   |
| genus<br>Alistipes           | 2.1 ± 2.8   | 1.1  | 0.1 - 2.9   | 1.4 ± 2.0   | 0.5  | 0.1 - 1.9   | 2.6 ± 3.1   | 1.6  | 0.3 - 3.7   |
| family<br>Porphyromonadaceae | 1.5 ± 1.6   | 1.1  | 0.5 - 1.9   | 1.4 ± 1.7   | 0.9  | 0.4 - 1.8   | 1.5 ± 1.5   | 1.1  | 0.6 - 2.0   |
| genus<br>Parabacteroides     | 1.0 ± 1.3   | 0.6  | 0.3 - 1.2   | 1.0 ± 1.5   | 0.5  | 0.2 - 1.2   | 1.0 ± 1.2   | 0.7  | 0.3 - 1.3   |
| phylum<br>Firmicutes         | 61.6 ± 12.0 | 62.6 | 54.2 - 70.5 | 59.3 ± 12.8 | 60.3 | 51.1 - 68.7 | 63.4 ± 11.1 | 64.3 | 56.4 - 71.2 |
| class<br>Clostridia          | 53.1 ± 14.4 | 54.6 | 43.9 - 63.7 | 49.5 ± 15.5 | 51.1 | 39.3 - 60.9 | 55.6 ± 13.0 | 57.3 | 47.4 - 64.7 |
| order<br>Clostridiales       | 53.1 ± 14.4 | 54.6 | 43.9 - 63.7 | 49.5 ± 15.5 | 51.1 | 39.3 - 60.9 | 55.6 ± 13.0 | 57.3 | 47.4 - 64.7 |
| family<br>Lachnospiraceae    | 32.4 ± 11.7 | 31.5 | 24.3 - 40.1 | 32.4 ± 12.1 | 31.3 | 24.4 - 40.3 | 32.4 ± 11.5 | 31.7 | 24.3 - 40.0 |
| genus<br>Blautia             | 7.3 ± 4.2   | 6.6  | 4.5 - 9.1   | 6.9 ± 3.9   | 6.3  | 4.4 - 8.8   | 7.5 ± 4.4   | 6.8  | 4.6 - 9.4   |
| genus<br>Anaerostipes        | 5.0 ± 5.5   | 3.4  | 1.1 - 7.1   | 5.3 ± 6.0   | 3.3  | 1.1 - 7.2   | 4.9 ± 5.1   | 3.4  | 1.0 - 7.0   |
| genus<br>Roseburia           | 4.0 ± 3.8   | 3.1  | 1.2 - 5.8   | 4.2 ± 3.9   | 3.2  | 1.3 - 6.0   | 3.9 ± 3.7   | 3.0  | 1.1 - 5.7   |
| genus<br>Fusicatenibacter    | 2.4 ± 2.4   | 1.9  | 0.5 - 3.5   | 2.3 ± 2.2   | 1.9  | 0.5 - 3.3   | 2.5 ± 2.5   | 1.9  | 0.5 - 3.6   |

|                                              |             |      |             |             |      |            |             |      |             |
|----------------------------------------------|-------------|------|-------------|-------------|------|------------|-------------|------|-------------|
| genus<br>Lachnospiracea<br>incertae<br>sedis | 1.9 ± 1.3   | 1.7  | 1.0 - 2.5   | 1.6 ± 1.1   | 1.4  | 0.9 - 2.2  | 2.0 ± 1.4   | 1.8  | 1.1 - 2.7   |
| family<br>Ruminococcaceae                    | 19.3 ± 11.3 | 18.9 | 10.1 - 27.5 | 15.8 ± 10.9 | 15.2 | 6.5 - 23.3 | 21.8 ± 11.0 | 21.3 | 13.1 - 29.7 |
| genus<br>Faecalibacterium                    | 7.7 ± 5.6   | 7.1  | 3.3 - 11.1  | 6.6 ± 5.3   | 6.1  | 2.5 - 9.5  | 8.4 ± 5.6   | 7.9  | 4.1 - 11.8  |
| genus<br>Ruminococcus                        | 3.3 ± 4.5   | 1.0  | 0.0 - 5.6   | 2.6 ± 3.7   | 0.5  | 0.0 - 4.4  | 3.9 ± 4.9   | 1.9  | 0.0 - 6.4   |
| genus<br>Ruminococcus2                       | 5.4 ± 5.6   | 3.9  | 1.3 - 7.6   | 5.4 ± 5.6   | 3.9  | 1.0 - 7.6  | 5.5 ± 5.6   | 4.0  | 1.4 - 7.5   |
| genus<br>Gemmiger                            | 2.4 ± 2.5   | 1.9  | 0.4 - 3.7   | 2.1 ± 2.2   | 1.6  | 0.1 - 3.1  | 2.7 ± 2.6   | 2.2  | 0.7 - 4.0   |
| family<br>Clostridiaceae                     | NA          | NA   | NA          | NA          | NA   | NA         | NA          | NA   | NA          |
| genus<br>Clostridium IV                      | 2.4 ± 3.8   | 0.9  | 0.3 - 2.7   | 1.8 ± 3.2   | 0.5  | 0.2 - 2.1  | 2.8 ± 4.2   | 1.3  | 0.4 - 3.4   |
| class<br>Negativicutes                       | 3.1 ± 4.3   | 1.6  | 0.9 - 3.6   | 3.9 ± 5.1   | 2.2  | 1.2 - 4.6  | 2.5 ± 3.6   | 1.4  | 0.8 - 2.6   |
| order<br>Selenomonadales                     | 3.1 ± 4.3   | 1.6  | 0.9 - 3.6   | 3.9 ± 5.1   | 2.2  | 1.2 - 4.6  | 2.5 ± 3.6   | 1.4  | 0.8 - 2.6   |
| family<br>Veillonellaceae                    | 2.3 ± 4.3   | 0.9  | 0.2 - 2.6   | 2.9 ± 5.1   | 1.1  | 0.2 - 3.4  | 1.9 ± 3.5   | 0.8  | 0.1 - 2.1   |
| genus<br>Megamonas                           | 1.0 ± 3.8   | 0.0  | 0.0 - 0.0   | 1.5 ± 4.7   | 0.0  | 0.0 - 0.0  | 0.7 ± 3.0   | 0.0  | 0.0 - 0.0   |
| class<br>Erysipelotrichia                    | 2.7 ± 2.9   | 1.7  | 0.7 - 3.8   | 2.9 ± 3.1   | 1.9  | 0.7 - 4.1  | 2.6 ± 2.8   | 1.7  | 0.7 - 3.5   |
| order<br>Erysipelotrichales                  | 2.7 ± 2.9   | 1.7  | 0.7 - 3.8   | 2.9 ± 3.1   | 1.9  | 0.7 - 4.1  | 2.6 ± 2.8   | 1.7  | 0.7 - 3.5   |

|                               |           |     |            |           |     |           |           |     |            |
|-------------------------------|-----------|-----|------------|-----------|-----|-----------|-----------|-----|------------|
| family<br>Erysipelotrichaceae | 2.7 ± 2.9 | 1.7 | 0.7 - 3.8  | 2.9 ± 3.1 | 1.9 | 0.7 - 4.1 | 2.6 ± 2.8 | 1.7 | 0.7 - 3.5  |
| class<br>Bacilli              | 2.6 ± 4.5 | 1.1 | 0.4 - 2.7  | 2.9 ± 4.8 | 1.1 | 0.4 - 2.8 | 2.5 ± 4.3 | 1.1 | 0.4 - 2.7  |
| order<br>Lactobacillales      | 2.6 ± 4.5 | 1.0 | 0.4 - 2.6  | 2.8 ± 4.8 | 1.0 | 0.3 - 2.6 | 2.4 ± 4.3 | 1.0 | 0.4 - 2.5  |
| family<br>Streptococcaceae    | 2.1 ± 3.7 | 0.8 | 0.3 - 2.1  | 2.1 ± 3.5 | 0.8 | 0.3 - 2.0 | 2.0 ± 3.8 | 0.8 | 0.3 - 2.1  |
| genus<br>Streptococcus        | 2.0 ± 3.7 | 0.8 | 0.3 - 2.1  | 2.1 ± 3.5 | 0.8 | 0.3 - 2.0 | 2.0 ± 3.8 | 0.8 | 0.3 - 2.1  |
| phylum<br>Proteobacteria      | 2.6 ± 2.8 | 2.0 | 1.2 - 3.2  | 3.1 ± 3.2 | 2.3 | 1.4 - 3.6 | 2.3 ± 2.4 | 1.7 | 1.0 - 2.8  |
| class<br>Betaproteobacteria   | 1.5 ± 1.3 | 1.3 | 0.5 - 2.1  | 1.8 ± 1.5 | 1.5 | 0.7 - 2.5 | 1.3 ± 1.1 | 1.1 | 0.5 - 1.9  |
| order<br>Burkholderiales      | 1.5 ± 1.3 | 1.3 | 0.5 - 2.1  | 1.8 ± 1.5 | 1.5 | 0.7 - 2.5 | 1.3 ± 1.1 | 1.1 | 0.5 - 1.9  |
| family<br>Sutterellaceae      | 1.4 ± 1.3 | 1.1 | 0.3 - 2.0  | 1.7 ± 1.5 | 1.4 | 0.5 - 2.4 | 1.2 ± 1.2 | 0.9 | 0.1 - 1.7  |
| family<br>Unclassified        | 1.0 ± 1.5 | 0.5 | 0.2 - 1.1  | 0.8 ± 1.3 | 0.4 | 0.1 - 0.8 | 1.1 ± 1.5 | 0.6 | 0.2 - 1.3  |
| genus<br>Unclassified         | 8.3 ± 4.7 | 7.3 | 5.1 - 10.1 | 7.9 ± 4.7 | 6.7 | 4.9 - 9.4 | 8.6 ± 4.7 | 7.6 | 5.3 - 10.4 |

---

NA; not analyzed



**Table S5.** Association between plasma LBP concentration and clinical markers or clinical scores<sup>1</sup> (All data)

| Category           | Variable                                  | $\beta$ | Q value |
|--------------------|-------------------------------------------|---------|---------|
| Obesity            | Abdominal circumference (cm) <sup>2</sup> | 0.02    | 0.05*   |
|                    | Body fat percentage (%)                   | 0.03    | 0.32    |
|                    | Body water content (kg)                   | -0.02   | 0.21    |
|                    | Visceral fat level (levels)               | 0.09    | 0.03*   |
|                    | Basal metabolic rate (kcal/day)           | -0.01   | 0.53    |
|                    | Basal metabolic rate level (levels)       | -0.08   | 0.03*   |
| Blood pressure     | Systolic blood pressure (mmHg)            | 0.07    | <0.001* |
|                    | Diastolic blood pressure (mmHg)           | 0.05    | 0.05*   |
| Arteriosclerosis   | baPWV (cm/s)                              | 0.08    | <0.001* |
| Glucose metabolism | HOMA-IR                                   | 0.18    | 0.04*   |
|                    | Blood glucose (mg/dL)                     | 0.02    | 0.41    |
|                    | HbA1c (%)                                 | 0.04    | 0.009*  |
|                    | Blood insulin ( $\mu$ U/mL)               | 0.16    | 0.04*   |
|                    | C peptide (ng/mL)                         | 0.14    | 0.009*  |
|                    | Glycoalbumin (%)                          | 0.02    | 0.37    |
| Lipid metabolism   | Triglyceride (mg/dL)                      | 0.13    | 0.14*   |
|                    | Total cholesterol (mg/dL)                 | 0.01    | 0.63    |
|                    | HDL-cholesterol (mg/dL)                   | -0.12   | <0.001* |
|                    | LDL-cholesterol (mg/dL)                   | 0.04    | 0.40    |
| Physical function  | Estimated bone mass (kg)                  | -0.01   | 0.63    |
|                    | Muscle mass (kg)                          | -0.01   | 0.52    |
|                    | Right leg (kg)                            | -0.02   | 0.27    |
|                    | Left leg (kg)                             | -0.02   | 0.29    |
|                    | Right arm (kg)                            | -0.02   | 0.19*   |
|                    | Left arm (kg)                             | -0.03   | 0.13*   |
|                    | Trunk (kg)                                | 0.00    | 0.80    |

|                         |                                         |       |         |
|-------------------------|-----------------------------------------|-------|---------|
| Eyesight                | Locomo 25 score (points)                | -1.84 | 0.24    |
|                         | Far-sightedness                         | -0.05 | 0.49    |
|                         | Near-sightedness                        | -0.02 | 0.73    |
| Liver function          | Albumin (g/dL)                          | -0.01 | 0.16*   |
|                         | AST (U/L)                               | 0.16  | <0.001* |
|                         | ALT (U/L)                               | 0.17  | 0.02*   |
|                         | γ-GTP (U/L)                             | 0.31  | <0.001* |
|                         | Total bilirubin (mg/dL)                 | -0.11 | 0.07*   |
|                         | Total Protein (g/dL)                    | 0.03  | <0.001* |
| Renal function          | Creatinine (mg/dL)                      | 0.02  | 0.48    |
|                         | Blood urea nitrogen (mg/dL)             | -0.01 | 0.75    |
|                         | Plasma renin activity (ng/mL/hr)        | 0.27  | 0.16*   |
|                         | Urine albumin creatinine ratio (mg/gCr) | 0.50  | 0.004*  |
| Adrenal cortex function | Aldosterone (pg/mL)                     | -0.01 | 0.77    |
|                         | Cortisol (μg/dL)                        | 0.14  | 0.02*   |
| Cardiac function        | Brain natriuretic peptide (pg/mL)       | 0.11  | 0.31    |
|                         | Troponin I (pg/mL)                      | 0.01  | 0.76    |
| Thyroid function        | Free thyroxine (ng/dL)                  | 0.05  | 0.02*   |
|                         | Thyroid stimulating hormone (μIU/mL)    | -0.07 | 0.58    |
| Sexual function         | Testosterone (ng/mL)                    | -0.08 | 0.26    |
| Inflammation            | Neutrophil (%)                          | 0.11  | <0.001* |
|                         | Stab neutrophil (%)                     | 0.44  | <0.001* |
|                         | Segmented neutrophil (%)                | 0.09  | <0.001* |
|                         | Lymphocyte (%)                          | -0.16 | <0.001* |
|                         | Monocyte (%)                            | 0.09  | 0.20    |
|                         | Eosinophil (%)                          | -0.67 | 0.06*   |
|                         | Basophil (%)                            | -0.18 | 0.10*   |
|                         | IgG (mg/dL)                             | 0.06  | 0.10*   |
|                         | IgA (mg/dL)                             | 0.17  | 0.009*  |
|                         | IgM (mg/dL)                             | 0.06  | 0.52    |

|                            |                                           |       |         |
|----------------------------|-------------------------------------------|-------|---------|
|                            | Complement C3 (mg/dL)                     | 0.16  | <0.001* |
|                            | Complement C4 (mg/dL)                     | 0.25  | <0.001* |
|                            | hs-CRP (mg/dL)                            | 1.52  | <0.001* |
|                            | IL-6 (pg/mL)                              | 0.43  | <0.001* |
| Oxidative stress           | 8-OHdG (ng/mL)                            | -0.08 | 0.29    |
| Hematological test         | White blood cell (cells/ $\mu$ L)         | 0.16  | <0.001* |
|                            | Red blood cell ( $10^4$ cells/ $\mu$ L)   | -0.01 | 0.54    |
|                            | Hemoglobin (g/dL)                         | -0.01 | 0.54    |
|                            | Hematocrit (%)                            | -0.54 | 0.32    |
|                            | Mean cell volume (fL)                     | 0.00  | 0.60    |
|                            | Mean corpuscular hemoglobin (pg)          | 0.00  | 0.80    |
|                            | Mean cell hemoglobin concentration (g/dL) | 0.00  | 0.46    |
|                            | Platelet ( $10^4$ cells/ $\mu$ L)         | 0.05  | 0.23    |
| Iron metabolism            | Ferritin (ng/mL)                          | -0.02 | 0.77    |
|                            | Serum iron (mmol/L)                       | -0.14 | 0.07*   |
| Electrolyte                | Blood sodium (mmol/L)                     | 0.00  | 0.24    |
|                            | Blood potassium (mmol/L)                  | 0.00  | 0.76    |
| Allergy                    | Total IgE (IU/mL)                         | 0.01  | 0.79    |
|                            | Anti-poaceae pollen IgE (UA/mL)           | -0.23 | 0.41    |
|                            | Anti-Weed IgE (UA/mL)                     | -0.10 | 0.56    |
|                            | Anti-House dust IgE (UA/mL)               | -0.12 | 0.63    |
|                            | Anti-Cedar pollen IgE (UA/mL)             | -0.19 | 0.57    |
| Rheumatoid arthritis       | Anti-CCP antibody (U/mL)                  | 0.09  | 0.52    |
| Pituitary gland function   | Prolactin (ng/mL)                         | 0.03  | 0.68    |
|                            | Follicle stimulating hormone (mIU/mL)     | 0.02  | 0.76    |
|                            | Adrenocorticotrophic hormone (pg/mL)      | 0.05  | 0.57    |
| Asthma/airway inflammation | FVC (L)                                   | 0.00  | 0.78    |
|                            | FVC to predicted FVC ratio (%)            | -0.01 | 0.72    |
|                            | FEV1 (L)                                  | 0.00  | 0.78    |

|                    |                                      |       |      |
|--------------------|--------------------------------------|-------|------|
|                    | FEV1 to predicted FEV1 ratio (%)     | 0.00  | 0.8  |
|                    | FEV1%G (%)                           | 0.01  | 0.67 |
|                    | FEV1%G to predicted FEV1%G ratio (%) | 0.01  | 0.60 |
|                    | MMF (L/s)                            | 0.04  | 0.49 |
|                    | MMF to predicted MMF ratio (%)       | 0.04  | 0.52 |
|                    | PEF (L/s)                            | -0.02 | 0.64 |
|                    | PEF to predicted PEF ratio (%)       | -0.02 | 0.62 |
|                    | PEF time (seconds)                   | 0.04  | 0.58 |
|                    | FET (seconds)                        | 0.10  | 0.34 |
|                    | EV (%)                               | 0.02  | 0.70 |
|                    | Exhaled H <sub>2</sub> (ppm)         | -0.07 | 0.67 |
|                    | Exhaled CH <sub>4</sub> (ppm)        | -0.03 | 0.72 |
| Mental health      | S-WHO-5 score (points)               | 0.05  | 0.78 |
| Depression         | CES-D score (points)                 | -0.69 | 0.61 |
| Cognitive function | MMSE score (points)                  | 0.09  | 0.63 |

\* $Q < 0.20$

<sup>1</sup> Multiple liner regression model was adjusted for age, sex, body mass index, smoking habit (current habitual smoker or not), drinking habit (current habitual drinker or not).

<sup>2</sup> The units used for the calculation of the  $\beta$  values are indicated.

baPWV, brachial-ankle pulse wave velocity; HOMA-IR, homeostasis model assessment-insulin resistance; HbA1c, Hemoglobin A1c; HDL, high-density lipoprotein; LDL, low-density lipoprotein; AST, aspartate aminotransferase; ALT, alanine aminotransferase;  $\gamma$ -GTP,  $\gamma$ -glutamyltransferase; Ig, immunoglobulin; hs-CRP, high-sensitivity C-reactive protein; IL, interleukin; 8-OHdG, 8-hydroxy-2-deoxyguanosine; CCP, cyclic citrullinated peptide; FVC, forced vital capacity; FEV, forced expiratory volume in one second; FEV1%G; FEV1/FVC; MMF, maximum mid-expiratory flow; PEF, peak expiratory flow; FET, Forced expiration time; EV, extrapolated volume; S-WHO-5, simplified Japanese version of the World Health Organization-Five Well-Being Index; CES-D, Center for Epidemiological Studies Depression; MMSE, Mini-Mental state examination

**Table S6.** Association between plasma LBP concentration and dietary factors<sup>1,2</sup> (All data)

| Category          | Variable                                            | $\beta$ | Q value |
|-------------------|-----------------------------------------------------|---------|---------|
| Blood antioxidant | Total carotenoids ( $\mu\text{g/mL}$ ) <sup>3</sup> | -0.05   | 0.19*   |
|                   | Lutein ( $\mu\text{g/mL}$ )                         | -0.04   | 0.33    |
|                   | Zeaxanthin ( $\mu\text{g/mL}$ )                     | -0.02   | 0.55    |
|                   | $\beta$ -Cryptoxanthin ( $\mu\text{g/mL}$ )         | -0.05   | 0.12*   |
|                   | $\alpha$ -Carotene ( $\mu\text{g/mL}$ )             | -0.01   | 0.71    |
|                   | $\beta$ -Carotene ( $\mu\text{g/mL}$ )              | -0.04   | 0.08*   |
|                   | Lycopene ( $\mu\text{g/mL}$ )                       | -0.02   | 0.40    |
|                   | Retinol ( $\mu\text{g/mL}$ )                        | 0.09    | 0.08*   |
|                   | Vitamin C ( $\mu\text{g/mL}$ )                      | 0.06    | 0.16*   |
|                   | $\alpha$ -Tocopherol ( $\mu\text{g/mL}$ )           | 0.06    | 0.36    |
| Nutrition intake  | Protein (100 g)                                     | -0.11   | 0.36    |
|                   | Fat (100 g)                                         | -0.19   | 0.15*   |
|                   | SFA (100 g)                                         | -0.48   | 0.26    |
|                   | MUFA (100 g)                                        | -0.47   | 0.17*   |
|                   | PUFA (100 g)                                        | -0.67   | 0.19*   |
|                   | Cholesterol (100 mg)                                | -0.01   | 0.43    |
|                   | Carbohydrate (100 g)                                | 0.00    | 0.80    |
|                   | Total dietary fiber (100 g)                         | -0.75   | 0.11*   |
|                   | Soluble (100 g)                                     | -2.62   | 0.10*   |
|                   | Insoluble (100 g)                                   | -1.09   | 0.11*   |
|                   | Sodium (100 mg)                                     | 0.00    | 0.69    |
|                   | Potassium (100 mg)                                  | -0.004  | 0.17*   |
|                   | Calcium (100 mg)                                    | -0.01   | 0.42    |
|                   | Magnesium (100 mg)                                  | -0.03   | 0.31    |
|                   | Phosphorus (100 mg)                                 | -0.01   | 0.36    |

|                       |                                  |        |       |
|-----------------------|----------------------------------|--------|-------|
|                       | Iron (100 mg)                    | -0.86  | 0.32  |
|                       | Zinc (100 mg)                    | -1.63  | 0.21  |
|                       | Copper (100 mg)                  | -7.82  | 0.37  |
|                       | Manganese (100 mg)               | 2.64   | 0.22  |
|                       | Retinol eq. (100 µg RE)          | 0.00   | 0.79  |
|                       | Vitamin D (100 µg)               | 0.01   | 0.79  |
|                       | α-Tocopherol (100 mg)            | -1.05  | 0.22  |
|                       | Vitamin K (100 µg)               | -0.02  | 0.16* |
|                       | Vitamin B <sub>1</sub> (100 mg)  | -13.90 | 0.13* |
|                       | Vitamin B <sub>2</sub> (100 mg)  | -3.41  | 0.51  |
|                       | Niacin (100 mg)                  | -0.22  | 0.49  |
|                       | Vitamin B <sub>6</sub> (100 mg)  | -5.37  | 0.28  |
|                       | Vitamin B <sub>12</sub> (100 µg) | 0.07   | 0.72  |
|                       | Folate (100 µg)                  | -0.01  | 0.49  |
|                       | Pantothenic acid (100 mg)        | -1.83  | 0.14* |
|                       | Alcohol (100 g)                  | 0.14   | 0.12* |
| Food intake           |                                  |        |       |
| Cereals               | Bread (100 g)                    | 0.01   | 0.72  |
|                       | Buckwheat noodles (100 g)        | 0.04   | 0.52  |
|                       | Japanese wheat noodles (100 g)   | 0.06   | 0.44  |
|                       | Chinese noodles (100 g)          | 0.06   | 0.30  |
|                       | Spaghetti and macaroni (100 g)   | -0.07  | 0.54  |
|                       | Rice (100 g)                     | 0.00   | 0.76  |
| Potatoes              | Potatoes (100 g)                 | -0.05  | 0.38  |
| Sugars and sweeteners | Sugar (100 g)                    | 0.07   | 0.74  |
|                       | Cooking sugar (100 g)            | -0.40  | 0.60  |
| Pulses                | Tofu/Deep fried tofu (100 g)     | -0.03  | 0.49  |
|                       | Natto (100 g)                    | -0.07  | 0.45  |

|                    |                                           |       |       |
|--------------------|-------------------------------------------|-------|-------|
| Vegetables         | Pickled green leaves vegetables (100 g)   | -0.09 | 0.58  |
|                    | Other pickled vegetables (100 g)          | -0.09 | 0.54  |
|                    | Raw lettuces/cabbage (100 g)              | -0.10 | 0.22  |
|                    | Green leaves vegetables (100 g)           | -0.03 | 0.52  |
|                    | Cabbage/Chinese cabbage (100 g)           | -0.10 | 0.11* |
|                    | Carrots/pumpkin (100 g)                   | -0.10 | 0.39  |
|                    | Japanese radish/turnip (100 g)            | -0.14 | 0.12* |
|                    | Other root vegetables (100 g)             | -0.07 | 0.30  |
|                    | Tomatoes (100 g)                          | -0.10 | 0.09* |
| Fruits             | Citrus fruit (100 g)                      | -0.05 | 0.53  |
|                    | Persimmons/strawberries/kiwifruit (100 g) | 0.00  | 0.80  |
|                    | Other fruit (100 g)                       | 0.01  | 0.77  |
|                    | 100% fruit and vegetable juice (100 g)    | 0.01  | 0.60  |
|                    | Seasonal citrus (100 g)                   | -0.05 | 0.66  |
|                    | Seasonal persimmon (100 g)                | -0.16 | 0.31  |
|                    | Seasonal strawberry (100 g)               | 0.02  | 0.78  |
| Mushroom           | Mushrooms (100 g)                         | -0.05 | 0.71  |
| Algae              | Seaweeds (100 g)                          | -0.06 | 0.64  |
| Fish and shellfish | Squid/octopus/shrimp/shellfish (100 g)    | 0.10  | 0.32  |
|                    | Small fish with bones (100 g)             | 0.06  | 0.60  |
|                    | Canned tuna (100 g)                       | -0.15 | 0.56  |
|                    | Dried fish/salted fish (100 g)            | 0.00  | 0.80  |
|                    | Oily fish (100 g)                         | -0.02 | 0.72  |
|                    | Lean fish (100 g)                         | 0.01  | 0.78  |
|                    | Raw fish (100 g)                          | 0.11  | 0.08* |
|                    | Grilled fish (100 g)                      | -0.03 | 0.51  |
|                    | Boiled fish (100 g)                       | 0.00  | 0.80  |
|                    | Fried fish (100 g)                        | 0.06  | 0.49  |
|                    | Chicken (100 g)                           | -0.09 | 0.21  |
|                    | Pork/beef (100 g)                         | -0.04 | 0.58  |

|                         |                                       |       |       |
|-------------------------|---------------------------------------|-------|-------|
|                         | Ham/sausage/bacon (100 g)             | -0.07 | 0.65  |
|                         | Liver (100 g)                         | 0.59  | 0.44  |
|                         | Grilled meat (100 g)                  | 0.01  | 0.79  |
|                         | Hamburg steak (100 g)                 | -0.03 | 0.59  |
|                         | Fried meat (100 g)                    | -0.03 | 0.66  |
|                         | Stir fry meat (100 g)                 | 0.00  | 0.77  |
|                         | Simmered meat (100 g)                 | -0.01 | 0.55  |
| Eggs                    | Egg (100 g)                           | -0.05 | 0.42  |
| Milk and dairy products | Low fat milk (100 g)                  | 0.00  | 0.80  |
|                         | Milk (100 g)                          | -0.01 | 0.48  |
|                         | Ice cream (100 g)                     | 0.03  | 0.59  |
| Fats and oils           | Cooking oil (100 g)                   | -0.04 | 0.78  |
| Confectioneries         | Western-type confectioneries (100 g)  | -0.06 | 0.43  |
|                         | Japanese-type confectioneries (100 g) | -0.10 | 0.54  |
|                         | Rice cracker/rice cake (100 g)        | 0.00  | 0.80  |
| Alcoholic beverage      | Sake (100 g)                          | 0.00  | 0.79  |
|                         | Beer (100 g)                          | 0.00  | 0.56  |
|                         | Shochu (100 g)                        | 0.05  | 0.11* |
|                         | Whiskey (100 g)                       | 0.05  | 0.55  |
|                         | Wine (100 g)                          | 0.03  | 0.54  |
| Non-alcoholic beverage  | Green tea (100 g)                     | 0.01  | 0.13* |
|                         | Black tea/oolong tea (100 g)          | 0.02  | 0.31  |
|                         | Coffee (100 g)                        | -0.01 | 0.51  |
|                         | Cola drink/soft drink (100 g)         | 0.00  | 0.79  |
| Seasonings and spices   | Mayonnaise/dressing (100 g)           | -0.39 | 0.23  |
|                         | Miso soup (100 g)                     | -0.01 | 0.31  |
|                         | Noodle soup (100 g)                   | 0.02  | 0.32  |
|                         | Soy sauce (100 g)                     | -2.91 | 0.44  |
|                         | Cooking salt (100 g)                  | -0.65 | 0.64  |

---

\* $Q < 0.20$



<sup>1</sup> Multiple liner regression model was adjusted for age, sex, body mass index, smoking habit (current habitual smoker or not), drinking habit (current habitual drinker or not), and energy intake.

<sup>2</sup> Nutrition intake and food intake were adjusted by energy intake using residual method.

<sup>3</sup> The units used for the calculation of the  $\beta$  values are indicated.

SFA; saturated fatty acid, MUFA; mono-unsaturated fatty acid, PUFA; poly-unsaturated fatty acid, eq.; equivalent

## References

- [130] H. Hamamura, H. Adachi, M. Enomoto, A. Fukami, S. Nakamura, Y. Nohara, N. Morikawa, A. Sakaue, K. Toyomasu, M. Yamamoto, Y. Fukumoto, Serum Proprotein Convertase Subtilisin/Kexin Type 9 (PCSK9) is Independently Associated with Insulin Resistance, Triglycerides, Lipoprotein(a) Levels but not Low-Density Lipoprotein Cholesterol Levels in a General Population, *J. Atheroscler. Thromb.* 28 (2021) 329–337. <https://doi.org/10.5551/jat.56390>.
- [131] Y. Hoshino, A. Seichi, [Locomo 25--a screening tool for risk of locomotive syndrome]., *Nihon Rinsho.* 72 (2014) 1839–43. <http://www.ncbi.nlm.nih.gov/pubmed/25509812>.
- [132] K. Ikeda, K. Noda, S. Yamaguchi, A Relation between Adaptation Luminance and Visual Acuity for the Landolt Ring under the Uniform Background, *J. Illum. Eng. Inst. Japan.* 64 (1980) 591–597. [https://doi.org/10.2150/jieij1980.64.10\\_591](https://doi.org/10.2150/jieij1980.64.10_591).
- [133] H. Inagaki, K. Ito, N. Sakuma, M. Sugiyama, T. Okamura, S. Awata, [Reliability and validity of the simplified Japanese version of the WHO-Five Well-being Index (S-WHO-5-J)], *Nihon. Koshu Eisei Zasshi.* 60 (2013) 294–301. <http://www.ncbi.nlm.nih.gov/pubmed/23942026>.
- [134] L.S. Radloff, The CES-D Scale, *Appl. Psychol. Meas.* 1 (1977) 385–401. <https://doi.org/10.1177/014662167700100306>.
- [135] M.F. Folstein, S.E. Folstein, P.R. McHugh, “Mini-mental state”. A practical method for grading the cognitive state of patients for the clinician., *J. Psychiatr. Res.* 12 (1975) 189–98. [https://doi.org/10.1016/0022-3956\(75\)90026-6](https://doi.org/10.1016/0022-3956(75)90026-6).
